1     **Basal ganglia and cerebellar contributions to vocal emotion processing: a**  
2                                     **high resolution fMRI study**

3     Leonardo Ceravolo<sup>1,2\*</sup>, Sascha Frühholz<sup>3,4,5</sup>, Jordan Pierce<sup>6</sup>, Didier Grandjean<sup>1,2‡</sup>, & Julie  
4                                     Péron<sup>6,7‡</sup>

5  
6     ‡ *These authors contributed equally to this work*

7  
8     <sup>1</sup> Neuroscience of Emotion and Affective Dynamics laboratory, Department of Psychology  
9     and Educational Sciences

10    <sup>2</sup> Swiss Centre for Affective Sciences, University of Geneva, Switzerland

11    <sup>3</sup> Department of Psychology, University of Zürich, Zürich, Switzerland

12    <sup>4</sup> Neuroscience Center Zurich, University of Zurich and ETH Zurich, Zurich, Switzerland

13    <sup>5</sup> Department of Psychology, University of Oslo, Oslo, Norway

14    <sup>6</sup> Clinical and Experimental Neuropsychology Laboratory, Department of Psychology and  
15    Educational Sciences, University of Geneva, Switzerland

16    <sup>7</sup> Cognitive Neurology Unit, Department of Neurology, University Hospitals of Geneva,  
17    Geneva, Switzerland

18

19    \* **Corresponding author:**

20    Leonardo Ceravolo, PhD

21    Neuroscience of Emotion and Affective Dynamics laboratory

22    Faculté de Psychologie et des Sciences de l'Education, Université de Genève

23    40 bd du Pont-d'Arve, 1205 Geneva, Switzerland

24    Phone: +41 22 379 9273

25    Email: [leonardo.ceravolo@unige.ch](mailto:leonardo.ceravolo@unige.ch)

26 **Abstract**

27 Until recently, brain networks underlying emotional voice prosody decoding and processing  
28 were focused on modulations in primary and secondary auditory, ventral frontal and  
29 prefrontal cortices, and the amygdala. Growing interest for a specific role of the basal ganglia  
30 and cerebellum was recently brought into the spotlight. In the present study, we aimed at  
31 characterizing the role of such subcortical brain regions in vocal emotion processing, at the  
32 level of both brain activation and functional and effective connectivity, using high resolution  
33 functional magnetic resonance imaging. Variance explained by low-level acoustic parameters  
34 (fundamental frequency, voice energy) was also modelled. Wholebrain data revealed expected  
35 contributions of the temporal and frontal cortices, basal ganglia and cerebellum to vocal  
36 emotion processing, while functional connectivity analyses highlighted correlations between  
37 basal ganglia and cerebellum, especially for angry voices. Seed-to-seed and seed-to-voxel  
38 effective connectivity revealed direct connections within the basal ganglia—especially between  
39 the putamen and external globus pallidus – and between the subthalamic nucleus and the  
40 cerebellum. Our results speak in favour of crucial contributions of the basal ganglia,  
41 especially the putamen, external globus pallidus and subthalamic nucleus, and several  
42 cerebellar lobules and nuclei for an efficient decoding of and response to vocal emotions.

43

44 **Keywords:** basal ganglia, cerebellum, voice, emotion, neuroimaging

45

46 Manuscript word count: 6598

## Basal ganglia, cerebellum in vocal emotion

47 Social communication through voice entails semantic as well as prosodic meaning, the latter  
48 being generally defined as the melody of the human voice. The processing of human voice  
49 prosody leads to widespread changes in multiple cerebral regions, especially in the superior  
50 temporal and inferior frontal cortices (Ethofer, Anders et al. 2006, Frühholz and Grandjean  
51 2013, Frühholz and Grandjean 2013, Grandjean in press). Although rarely put forward, the  
52 implication of the basal ganglia should be strongly emphasized. In fact, given their tripartite  
53 functional compartmentalization, whereby each basal ganglia (BG) is linked to either the  
54 motor, associative or limbic cortex (Alexander and Crutcher 1990, Lambert, Zrinzo et al.  
55 2012), there is every reason to suppose that these structures play a major role in emotional  
56 processing in humans. This assertion is reinforced by both the BG's intrinsic function and  
57 their functional and effective connectivity with the rest of the brain (Pierce and Péron 2020).  
58 There is growing evidence for the involvement of the BG in emotional processing, especially  
59 for emotions conveyed by the human voice (i.e., emotional prosody), not only directly, but  
60 also through their connections with structures known to be involved in emotional processing,  
61 such as the superior frontal and temporal gyri, the amygdala and the cerebellum (Thomasson,  
62 Saj et al. 2019). This involvement has been revealed by functional magnetic resonance  
63 imaging (fMRI) (Péron, Frühholz et al. 2016), electrophysiological data (Péron, Haegelen et  
64 al. 2014), lesion studies (Cohen, Riccio et al. 1994), as well as by deep brain stimulation of  
65 the BG, a neurosurgical technique that has recently drawn researchers' attention to the  
66 possible functional roles of these structures in human emotional processing (for a review, see  
67 Péron, Frühholz et al. 2013).

68 Since the role of the BG was first hypothesized in vocal emotion decoding, evidence  
69 gathered from fMRI and lesion models has led to the hypothesis that they play a critical and  
70 potentially direct role in prosody processing, by promoting efficient decoding of emotional  
71 information from vocal cue sequences and rhythmic aspects of speech (Pell and Leonard

## Basal ganglia, cerebellum in vocal emotion

72 2003, Kotz and Schwartz 2010). The highly connected, closed loop nature of the BG make  
73 them perfectly situated to coordinate activity in other cortical and subcortical regions related  
74 to emotional voice perception. The BG, specifically the subthalamic nucleus (STN), may  
75 synchronize neural oscillations within a broader limbic network in order to facilitate efficient  
76 processing of auditory and emotion information (Péron, Frühholz et al. 2013). This  
77 synchronization would strengthen cortical representations of repeated stimulus-response  
78 pairings to form “chunks” of behavioural/cognitive response patterns that could be processed  
79 more automatically over learning (Graybiel 2008). Simultaneously, these chunks may be  
80 modified by the cerebellum to minimize the prediction error of an internal model based on its  
81 representation of the current sensory state and expected outcome of ongoing auditory  
82 processing (Sokolov, Miall et al. 2017, Bostan and Strick 2018). Furthermore, the BG and  
83 cerebellum may analyse temporal patterns in acoustic stimuli to extract salient emotional cues  
84 to feedback to cortex. Nevertheless, the way in which these subcortical and cortical structures  
85 exhibit coupling (or decoupling) in order to allow the emergence of a cognitive process such  
86 as emotional prosody recognition (i.e., functional integration) remains largely unexplored in  
87 affective neuroscience, especially the patterns of connectivity between the BG and the  
88 cerebellum, which should play a critical role in vocal emotion decoding (Thomasson, Saj et  
89 al. 2019, Pierce and Péron 2020). So far, we spoke about the BG as a whole concept without  
90 differentiating their abovementioned subparts and functional sub-territories. As for the  
91 subthalamic nucleus, the BG can be divided in at least three functional compartments relative  
92 to their cortical efferences: motor, associative and limbic (Alexander and Crutcher 1990,  
93 Lambert, Zrinzo et al. 2012, Pierce and Péron 2020). In the present study, we were  
94 specifically interested in the limbic BG due to the emotional nature of the stimuli presented to  
95 our participants. More specifically, BG regions of interest were the striatum, the globus  
96 pallidus (internal and external parts) and the subthalamic nucleus (Schneider, Habel et al.

Basal ganglia, cerebellum in vocal emotion

97 2003, Wager, Barrett et al. 2008, Kotz, Schwartz et al. 2009, Péron, Frühholz et al. 2015,  
98 Pierce and Péron 2020). These BG regions also play a critical role in selecting a relevant  
99 response pattern –and inhibiting irrelevant ones– and in reward feedback and anticipation  
100 (Pierce and Péron 2020). BG efferences also connect them more directly to the cerebellum,  
101 which can also be separated into motor, associative, limbic and cognitive subparts (Leggio  
102 and Olivito 2018). Cerebellum functional subparts were recently highlighted by resting state  
103 functional connectivity (Buckner, Krienen et al. 2011), specific task-based parcellation (King,  
104 Hernandez-Castillo et al. 2019) and cerebellar topography (Leggio and Olivito 2018). In the  
105 scope of the present study, the cerebellum would help fine-tune the selected response initiated  
106 in the BG, generate an internal model of current goal states and somehow close the loop of  
107 reward encoding (Larry, Yarkoni et al. 2019, Pierce and Péron 2020) in addition to  
108 simultaneously assessing auditory timing for further iterations of vocal emotion decoding  
109 across time (Lesion studies: Grube, Cooper et al. 2010, Breska and Ivry 2016, Breska and Ivry  
110 2018). Specific areas of the cerebellum associated with (vocal) emotion processing are the  
111 cerebellum crus of ansiform lobule I and II (Crus I,II), cerebellar lobules IV, V, VI, VIIb, VIII  
112 and IX, Vermis (Habas, Kamdar et al. 2009, Stoodley and Schmahmann 2009, Stoodley and  
113 Schmahmann 2009, Baumann and Mattingley 2012, Leggio and Olivito 2018, Thomasson,  
114 Saj et al. 2019, Pierce and Péron 2020) and deep cerebellar nuclei, especially the dentate  
115 (Pierce and Péron 2020) and fastigial nucleus (Wang, Dong et al. 2014, Zhang, Wang et al.  
116 2016).

117 Although recent neuroimaging studies helped gain new insights into the role(s) of the  
118 BG in emotion processing, some of them still presented shortcomings that needed to be  
119 overcome. To date, these studies have failed to focus specifically on the BG, meaning that the  
120 measurement of the Blood-Oxygenation-Level Dependent (BOLD) signal was not restricted  
121 to these regions, thus reducing the spatial resolution in favour of a larger field of view. They

## Basal ganglia, cerebellum in vocal emotion

122 also failed to investigate the functional and effective connectivity among the BG and between  
123 the BG and different subparts of the temporal regions (Frühholz, Ceravolo et al. 2011) that  
124 sustain emotional prosody processing, and more crucially between the BG and the  
125 cerebellum. Finally, the paradigms used so far in the literature did not test the impact of low-  
126 level acoustic parameters on voice prosody processing in the BG or cerebellum, even though  
127 these parameters greatly impact the BOLD signal at least in temporal and frontal brain regions  
128 (Schirmer and Kotz 2006, Frühholz, Ceravolo et al. 2012).

129         Considering abovementioned literature, the present study was designed to improve our  
130 current understanding of the functional integration of the BG and cerebellum during  
131 emotional prosody processing in humans, taking into account low-level acoustic parameters  
132 of interest such as synthesized fundamental frequency ( $f_0$ ) and energy, using high resolution  
133 fMRI in healthy participants. We therefore hypothesized: (i) an increase of BOLD signal in  
134 the STN, striatum, globus pallidus (internal, GPi; external, GPe) and cerebellum (Crus I-II,  
135 Vermis, cerebellar lobules IV-IX) during the processing of emotional (angry and happy)  
136 voices, as opposed to emotionally neutral voice prosody and (ii) similarly for emotional  
137 voices when removing variance explained by low-level acoustics (synthesized energy and  $f_0$ );  
138 (iii) enhanced BOLD signal in the BG (STN, striatum, globus pallidus) for angry voice  
139 envelope (synthesized energy); (iiii) functional connectivity between the BG, especially in the  
140 STN and GPi/GPe, the cerebellum (Vermis and cerebellar lobules IV-IX, dentate nucleus) and  
141 temporal (superior temporal gyrus) and frontal voice areas (inferior frontal cortex,  
142 orbitofrontal cortex) when contrasting emotional to neutral voices (independently of  
143 synthesized energy and  $f_0$ ); (iiiiii), enhanced effective coupling within the BG (striatum, STN,  
144 GPi/GPe) for angry and/or happy voices.

145

## 146 **Material and methods**

### 147 *Participants*

148 We initially included 19 healthy participants but excluded four of them from the analyses  
149 because of MRI signal artifacts (N=2) or psychiatric disorder (N=2). The remaining sample  
150 consisted of seven males and eight females (N=15), with a mean age of 30.5 years (SD =  
151 3.48, range 27-37 years; mean age (SD) for female participants was 30.25 (3.24) and for male  
152 participants 30.85 (3.98)). All included participants were right-handed, native French  
153 speakers, and had normal or corrected-to-normal vision and normal hearing. None of them  
154 had a history of neurological disease or psychiatric disorder. Participants gave written  
155 informed consent for their participation in accordance with the ethical and data security  
156 guidelines of the University of Geneva. The study was approved by the local ethics committee  
157 and conducted according to the Declaration of Helsinki.

158

### 159 **Experimental setup**

#### 160 *Main task*

#### 161 *Stimuli*

162 The vocal (prosodic) stimuli consisted of two pseudosentences spoken with different  
163 emotional prosodies (“*ne kali bam sud molen!*” and “*kun se mina lod belam?*”); mean duration  
164 = 1642 ms, range = 854-2788 ms) extracted from a previously validated database, the GENEVA  
165 Multimodal Emotion Portrayals (GEMEP) corpus (Banziger and Scherer 2010). Alongside  
166 these prosodic stimuli (anger, happiness and neutral), we played synthesized stimuli, built  
167 from the original emotional and neutral sounds, in order to control for the temporal dynamics  
168 of energy and  $f_0$ . These two basic acoustic features are known to be the most correlated with

## Basal ganglia, cerebellum in vocal emotion

169 emotional prosody judgments (e.g., Banse and Scherer 1996, Grandjean, Banziger et al.  
170 2006). The first type of synthetic stimulus (synthesized *intensity*) consisted of a section of  
171 white/pink noise, to which the intensity contour of the original stimulus was applied. The  
172 second type of synthetic stimulus (synthesized  $f_0$ ) was a series of pure sine waves (with  
173 constant amplitude), the frequency of which corresponded to the  $f_0$  of the original vocal  
174 stimulus, allowing us to maintain the temporal dynamics of the  $f_0$ . Both synthetic stimuli had  
175 the same duration as in the original recordings. All sounds were matched for mean energy to  
176 avoid too strong loudness effects. Two runs were constructed, featuring the different kinds of  
177 stimuli in pseudorandom order (no more than three times for the same experimental  
178 condition). Each run contained 20 trials featuring anger stimuli, 20 trials featuring happiness  
179 stimuli, and 20 trials featuring neutral stimuli, as well as 15 synthesized intensity stimuli, 15  
180 synthesized  $f_0$  stimuli, and one section of white noise at the beginning (first stimulus) with a  
181 gradual onset to accustom the participants to the auditory material. Each run contained a  
182 different list of stimuli. In each prosodic condition, we controlled for the pseudo-sentence  
183 being pronounced and the sex of the actor who pronounced the utterances: a female actor  
184 pronounced half the stimuli, half of them consisting of the pseudo-sentence "*ne kali bam sud*  
185 *molen!*". The total duration of each run was ~10 minutes, and there was a short break between  
186 them. Each run contained pairs of identical subsequent stimuli, representing 10% of the total  
187 stimuli (pseudorandom order) to allow a one-back task to be performed by the participants,  
188 therefore forcing them to carefully attend each stimulus.

### 189 *Experimental procedure, paradigm*

190 In order to avoid expectancy effects, we varied in each trial the duration of the interval  
191 between the onset of the fixation cross and the onset of the auditory stimulus. In other words,  
192 the presentation of each auditory stimulus was preceded by a silent portion of pseudorandom  
193 duration, ranging from 50 to 250 ms, the so-called jitter (Fig.1). After the offset of the sound,



Basal ganglia, cerebellum in vocal emotion

194 we also included a silent portion ranging from 3000 to 3500 ms. In order to avoid the offset of  
195 the sound and the offset of the fixation cross being synchronous, we varied the duration of the  
196 interval between these two offsets. Finally, in order to minimize any retinal afterimage, we  
197 ensured that the color of the fixation cross did not contrast too greatly with the color of the  
198 desktop background.

A

Example of two consecutive trials of the one-back task

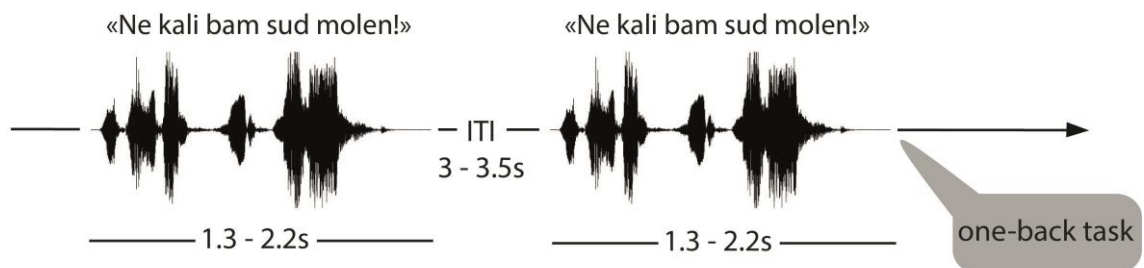

B

Example of stimuli

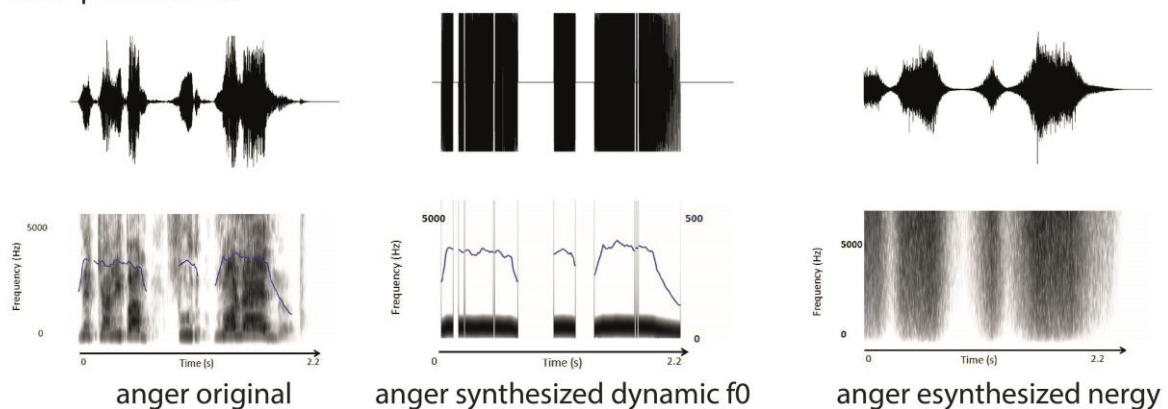

199

200 Fig.1: Experimental timeline and details of stimuli for the one-back task. A, Following  
201 technical scans (localizer and field map), the first run started for 10 min during which  
202 participants had to perform a one-back task on the voice presented auditorily to them using an  
203 MRI-compatible button box. The second run followed similarly for 10 more minutes and the  
204 session ended with the acquisition of an anatomical image for 5 min. During the complete  
205 session, the participant laid down in the scanner and had to pay attention to auditorily  
206 presented vocal stimuli and do a one-back task (10% of all trials). All stimuli had a duration  
207 of 1.3 to 2.2 s and an inter trial interval of 3 to 3.5 s. B, Voice stimuli consisted of  
208 pseudowords arranged in sentences with either original vocal signal, synthesized dynamic  $f_0$   
209 manipulation or synthesized energy.

## Basal ganglia, cerebellum in vocal emotion

210

211 For each trial, the participants were asked to keep their eyes open and relaxed. They were told  
212 they would hear meaningless speech uttered by male and female actors, as well as synthesized  
213 sounds. The binaurally recorded auditory stimuli were played through MR-compatible  
214 headphones. Loudness intensity was adjusted for each participant according to her/his hearing  
215 threshold at the beginning of the experiment. Participants were asked to focus on these  
216 auditory stimuli and to press a button whenever they heard two identical stimuli in a row.  
217 These one-back trials represented only 10% of all trials and were excluded from the analyses.  
218 The one-back task was administered to ensure that the patients were paying attention to the  
219 stimuli. Prior to the task, an MR-compatible response box (Current Designs Inc., Philadelphia,  
220 PA, USA) was placed beneath the participant's fingers.

221

### 222 *Image acquisition*

223 Imaging was conducted at the Brain and Behaviour Laboratory (BBL) of the University of  
224 Geneva. For the main task, high-resolution imaging data was acquired on a 3T Siemens Trio  
225 System (Siemens, Erlangen, Germany) using a T2\*-weighted gradient echo planar imaging  
226 sequence with 440 volumes per run (EPI; 1.5x1.5x2.2mm voxels, slice thickness=2mm,  
227 gap=0.2mm, 31 slices, RT=2320ms, TE=33ms, flip angle = 90°, matrix=128x128, field of  
228 view=192mm). The acquired volumes, representing a truncated field of view compared to  
229 standard wholebrain acquisition, were almost perpendicular to the anterior commissure-  
230 posterior commissure (AC/PC) line to cover all regions of interest, especially the basal  
231 ganglia, cerebellum and the temporal lobe (see Fig.S1 in the Supplementary material).  
232 Therefore, the term 'wholebrain' in this manuscript refers exclusively to our truncated field of  
233 view, not to volumes covering the wholebrain. The total number of volumes for our fifteen  
234 participants was 13'200 for a total number of slices of 409'200. A T1-weighted,

## Basal ganglia, cerebellum in vocal emotion

235 magnetization- prepared, rapid-acquisition, gradient echo anatomical scan (slice  
236 thickness=1mm, 176 slices, RT=2530ms, TE=3.31ms, flip angle = 7°, matrix=256x256,  
237 FOV=256mm) was also acquired.

238

### 239 *Image analysis*

#### 240 *Wholebrain analyses*

241 Functional images analysis was carried out using Statistical Parametric Mapping software 12  
242 (SPM12, Wellcome Trust Centre for Neuroimaging, London, UK). Preprocessing steps  
243 included realignment to the first volume of the time series, slice timing, iterative  
244 normalization into the Montreal Neurological Institute space (Collins, Neelin et al. 1994)  
245 using the DARTEL toolbox (Ashburner 2007) and spatial smoothing with an isotropic  
246 Gaussian filter of 6 mm full width at half maximum. To remove low-frequency components,  
247 we used a high-pass filter with a cutoff frequency of 128 s. Anatomical locations were defined  
248 using a standardized coordinate database using the Automated Anatomical Labelling atlas  
249 (Tzourio-Mazoyer, Landeau et al. 2002) incorporated in the xjView toolbox  
250 (<http://www.alivelearn.net/xjview>), an atlas of the brainstem (Fonov, Evans et al. 2011), basal  
251 ganglia (Amunts, Lepage et al. 2013) and cerebellum (Diedrichsen, Balsters et al. 2009,  
252 Diedrichsen, Maderwald et al. 2011) displayed in FMRIB Software Library v6.0 ('FSL';  
253 Smith, Jenkinson et al. 2004) through FSLEyes.

254 A general linear model was used to compute first-level statistics, in which each run  
255 was modelled as a distinct session and each trial was convolved with the hemodynamic  
256 response function, time-locked to the onset of each stimulus. Separate regressors were created  
257 for each condition, namely for the Emotion and the Acoustic Parameters factors (Design  
258 matrix columns for each run (N=9): anger original, anger  $f_0$ , anger energy, happy original,

## Basal ganglia, cerebellum in vocal emotion

259 happy  $f_0$ , happy energy, neutral original, neutral  $f_0$ , neutral energy). Finally, regressors of no-  
260 interest included the repetition trials of the one-back task that were concatenated across  
261 conditions and added as an additional regressor together with six motion parameters for each  
262 run to account for movement. Regressors of interest were used to compute nine simple  
263 contrasts (one per column of the design matrix, across runs) for each participant (across runs),  
264 leading to a main effect of each condition cited above at the first-level of analysis. Simple  
265 contrasts were then used in three distinct flexible factorial, second-level analyses. In model 1,  
266 the effect of the Emotion (angry, happy, neutral voices, acoustically untouched or ‘original’)  
267 factor was modelled with one Participant factor and one Emotion factor. In model 2, factors  
268 Participant, Emotion (angry, happy, neutral voices) and Acoustic Parameters (original,  $f_0$   
269 synthesized, energy synthesized parameters) were included to model the two-way interaction  
270 between our main factors (Emotion\*Acoustic Parameters). Model 3 included the main effect  
271 of the Acoustic Parameters (normal,  $f_0$  synthesized, energy synthesized parameters) factor,  
272 modelled with one Participant factor and one Acoustic Parameters factor. For each model,  
273 independence of the Participant factor was set to ‘true’, variance to ‘unequal’ and the  
274 Emotion, Acoustic Parameters and Emotion\*Acoustic Parameters factors with independence  
275 as ‘false’, variance as ‘unequal’.

276 All neuroimaging activations were thresholded in SPM12 by using a wholebrain  
277 voxel-wise false discovery rate (FDR) correction at  $p < .05$  with an arbitrary cluster extent of  
278  $k > 10$  voxels.

### 279 *Functional and effective connectivity analysis*

280 Functional and effective connectivity analyses were performed using the CONN toolbox  
281 (Whitfield-Gabrieli and Nieto-Castanon 2012) version 18.b implemented in Matlab 9.0 (The  
282 MathWorks, Inc., Natick, MA, USA) for the two-way interaction between our factors, namely  
283 Emotion and Acoustic Parameters (design matrix identical to wholebrain analyses). As in

## Basal ganglia, cerebellum in vocal emotion

284 wholebrain data analysis, repetition trials of the one-back task were modelled as a single  
285 column including a concatenation of all their onset times across conditions (regressor of no-  
286 interest). Functional connectivity analyses were mainly carried out to orient further effective  
287 connectivity analysis and we decided to report both types of connectivity for a clear overview  
288 of the results. Functional connectivity analyses were computed using as seeds each region of  
289 interest (ROI) of the following atlases: the Automated Anatomical Labelling atlas ('aal'; 58  
290 ROI; Tzourio-Mazoyer, Landeau et al. 2002), an atlas of the brainstem (23 ROI; Fonov,  
291 Evans et al. 2011), basal ganglia (22 ROI; Amunts, Lepage et al. 2013) and cerebellum (34  
292 ROI; Diedrichsen, Balsters et al. 2009, Diedrichsen, Maderwald et al. 2011). All ROI  
293 (N=137; Supplementary Table 1) were within the bounds of our truncated field of view.  
294 Frontal, parietal and occipital areas outside the bounds of our field of view, specifically of the  
295 'aal' atlas, were isolated through CONN time-course visualization and removed from the  
296 analyses. For effective connectivity analyses and according to our hypotheses, seed regions  
297 were limited to the basal ganglia (22 ROI; Amunts, Lepage et al. 2013). Spurious sources of  
298 noise were estimated and removed using the automated toolbox preprocessing algorithm, and  
299 the residual BOLD time-series was band-pass filtered using a low frequency window ( $0.008 <$   
300  $f < 0.09$  Hz). Correlation maps were then created for each condition of interest by taking the  
301 residual BOLD time-course for each condition from atlas regions of interest and computing  
302 bivariate Pearson's correlation coefficients between the time courses of each voxel of each  
303 ROI of the atlas, averaged by ROI ('functional connectivity' analyses). 'Effective  
304 connectivity' was approached using multivariate regressions between each seed ROI and all  
305 other ROI – or all brain voxels for seed to voxel analysis – and a model was generated and  
306 used to characterize the direct connectivity between pairs. For both types of connectivity, we  
307 used generalized psychophysiological interaction (gPPI) measures, representing the level of  
308 task-modulated (often labelled 'effective') connectivity between ROI or between ROI and

## Basal ganglia, cerebellum in vocal emotion

309 voxels. gPPI is computed using a separate multiple regression model for each target  
310 (ROI/voxel). Each model includes three predictors: 1) task effects convolved with a canonical  
311 hemodynamic response function (psychological factor); 2) each seed ROI BOLD time series  
312 (physiological factor) and 3) the interaction term between the psychological and the  
313 physiological factors, the output of which is regression coefficients associated with this  
314 interaction term. Finally, group-level analyses were performed on these regression  
315 coefficients to assess for main effects within-group for contrasts of interest in seed-to-seed  
316 and seed-to-voxel analyses. Therefore, ‘functional connectivity’ is defined in the present  
317 study as a gPPI analysis using bivariate correlations between ROI, while ‘effective  
318 connectivity’ defines the gPPI analysis using multivariate regressions between ROI/voxels.  
319 Connectivity analyses were computed using methods in line with most recent best practices  
320 (Reid, Headley et al. 2019). For both analyses, type I error was controlled by the use of seed-  
321 level (seed-to-seed analyses) and cluster-level (seed-to-voxel analysis) false discovery rate  
322 correction with  $p < .05$  FDR to correct for multiple comparisons.

323

## 324 **Results**

### 325 *Wholebrain results*

326 We performed voxel-level general linear analyses subdivided into three different models in  
327 order to find enhanced brain activity related to the factorial design of our data. The models of  
328 interest were model 1 and 2, in which we modelled the Emotion factor and the two-way  
329 interaction between Emotion and Acoustic Parameters factors. The former analysis revealed  
330 emotion-specific enhanced patterns of activity that are presented in this section (for the  
331 general effect of Emotion, see Fig.S2 in the Supplementary material), while the full  
332 interaction between factors did not yield any significant results. We present, however, one  
333 significant result of interest, as part of our hypotheses, for the rhythmicity of angry voices

## Basal ganglia, cerebellum in vocal emotion

334 (synthesized energy of angry > neutral prosody). Finally, results for model 3 – the main effect  
335 of Acoustic Parameters – are reported in the supplementary data (Supplementary data, Tables  
336 2-4).

### 337 *Main effect of Emotion factor*

338 Wholebrain results for the Emotion factor revealed significant enhanced activity for both  
339 angry > neutral voices (Table 1) and happy > neutral voices (Table 2) contrasts. Enhanced  
340 activations for emotional (angry and happy) compared to neutral voices were also significant  
341 especially in the superior temporal cortex and inferior frontal cortex, bilaterally (see Table 3).  
342 Brain activity specific to angry voices (angry > neutral voices) replicated the involvement of  
343 the temporal cortex for processing such stimuli, especially in the anterior part of the middle  
344 temporal cortex (aMTG) and the posterior superior temporal gyrus and sulcus (pSTG and  
345 pSTS, respectively), bilaterally (Fig.2ABG). Enhanced activity was also observed in medial  
346 brain areas such as the anterior cingulate cortex (ACC), the parahippocampal gyrus and the  
347 fusiform gyrus (Fig.2CD). Activity in the basal ganglia was restricted to the external globus  
348 pallidus (GPe) while we also observed enhanced activity in several parts of the thalamus  
349 (Fig.2E). Finally, large parts of the cerebellum were also more active (Fig.2G) during angry  
350 as opposed to neutral voice processing, namely the Crus II area (Fig.2B), lobules IV-V and VI  
351 (Fig.2CF), Vermis area VI (Fig.2D) as well as deep nuclei such as the dentate (Fig.2CF) and  
352 fastigial nucleus (Fig.2F). More details are available in Table 1.

## Basal ganglia, cerebellum in vocal emotion

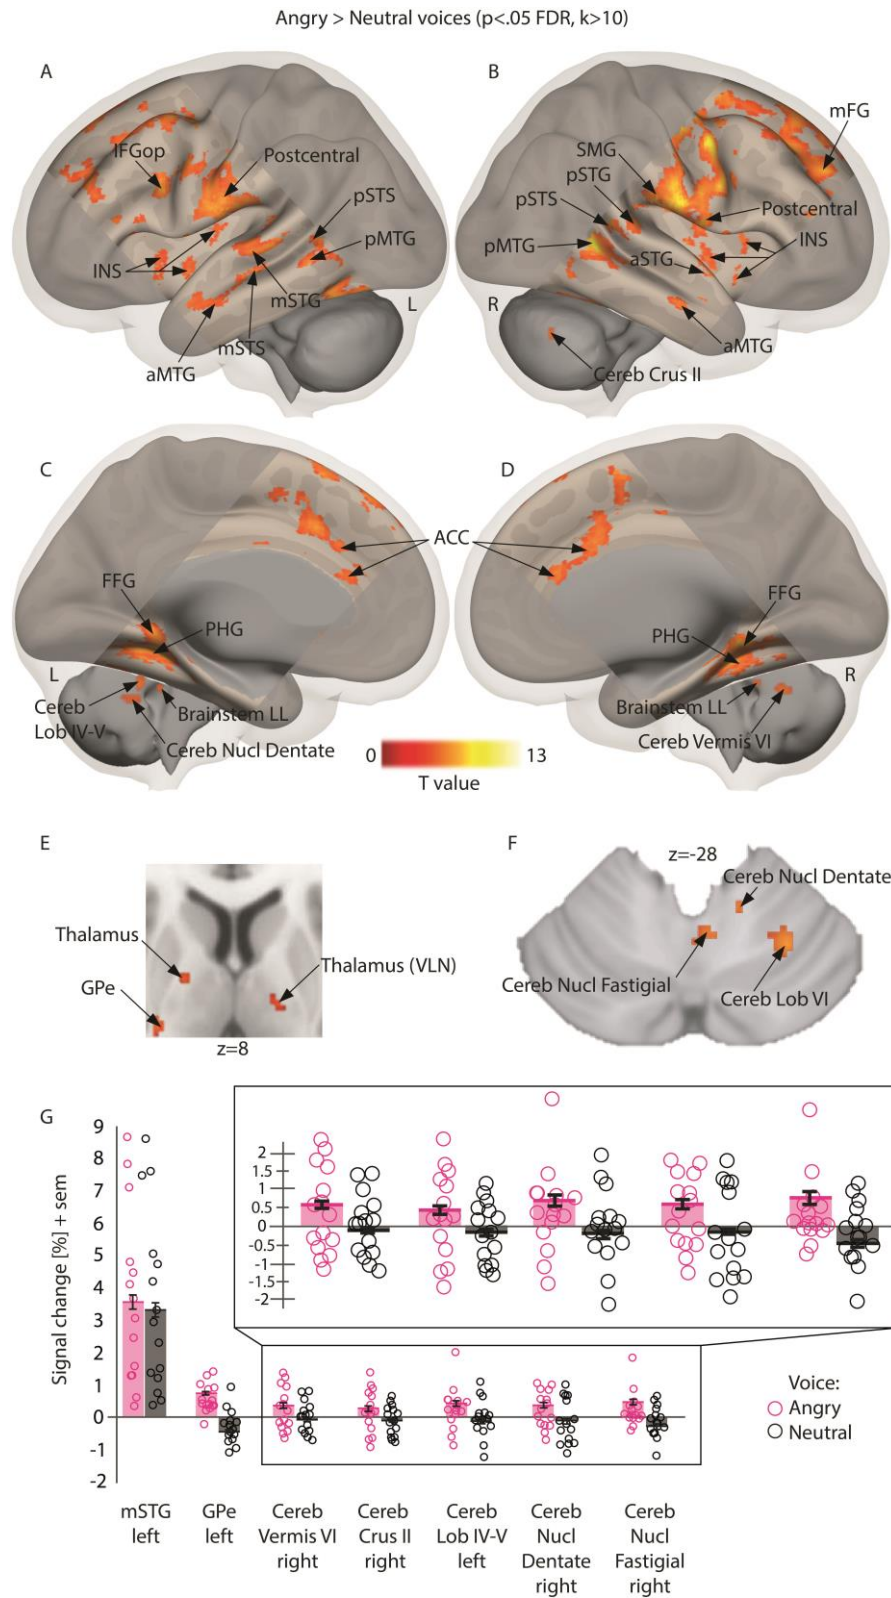

353

354 Fig.2: Enhanced brain measures for implicitly processing angry compared to neutral voices,  
 355 corrected for multiple comparisons (wholebrain voxel-wise  $p < .05$  FDR,  $k > 10$  voxels). A-B,  
 356 Lateral activations rendered on a sagittal image highlighting middle and superior temporal  
 357 regions. C-D, Medial activations of the anterior cingulate cortex, parahippocampal cortex and



Basal ganglia, cerebellum in vocal emotion

358 cerebellum. E, Subcortical activity in the thalamus and globus pallidus displayed on an axial  
359 slice. F, Cerebellar activations displayed on an axial slice. G, Percentage of signal change  
360 extracted using singular value decomposition on 9 voxels around each peak in a subset of  
361 regions with individual values (circles), mean values (bars) and standard error of the mean  
362 (error bars) for angry and neutral voices. Pink circles: angry voices; Black circles: neutral  
363 voices. L: left; R: right; IFGop: inferior frontal gyrus pars opercularis; STG: superior  
364 temporal gyrus; STS: superior temporal sulcus; MTG: middle temporal gyrus; INS: insula;  
365 SMG: supramarginal gyrus; FG: frontal gyrus; FFG: fusiform gyrus; PHG: parahippocampal  
366 gyrus; ACC: anterior cingulate cortex; Cereb: cerebellum; Cereb Lob: cerebellum lobule;  
367 Cereb Nucl Dentate: dentate nucleus of the cerebellum; Cereb Nucl Fastigial: fastigial nucleus  
368 of the cerebellum; Brainstem LL: lateral lemniscus of the brainstem; Thalamus VLN: ventral  
369 lateral nucleus of the thalamus; GPe: external globus pallidus; Cereb Crus: cerebellum crus of  
370 ansiform lobule; ACC: anterior cingulate cortex. 'a' prefix: anterior part; 'm' prefix: mid part;  
371 'p' prefix: posterior part.

372

373 As for angry voices, brain activity specific to normal happy voices (happy > neutral voices)  
374 highlighted the anterior, mid and posterior portions of the temporal cortex (aSTS, aMTG;  
375 mSTS, mSTG; pSTS, pSTG, pMTG, respectively), bilaterally (Fig.3ABG). Enhanced activity  
376 was medially observed in the ACC, parahippocampal gyrus and fusiform gyrus (Fig.3CD).  
377 Increase of activity in the basal ganglia was observed in the GPe and bilateral putamen, and in  
378 the ventral lateral nucleus of the thalamus (Fig.3E). Multiple subparts of the cerebellum  
379 showed significant differences. Cerebellum areas were more activated (Fig.3G) during happy  
380 as opposed to neutral voice processing, especially in the lateral Crus I area, bilaterally  
381 (Fig.3ABF), in lobules VI, VIIb and VIII (Fig.3CDF), in Vermis areas III and IV-V  
382 (Fig.3CD) as well as in the dentate nucleus (Fig.3F). More details are available in Table 2.

### Basal ganglia, cerebellum in vocal emotion

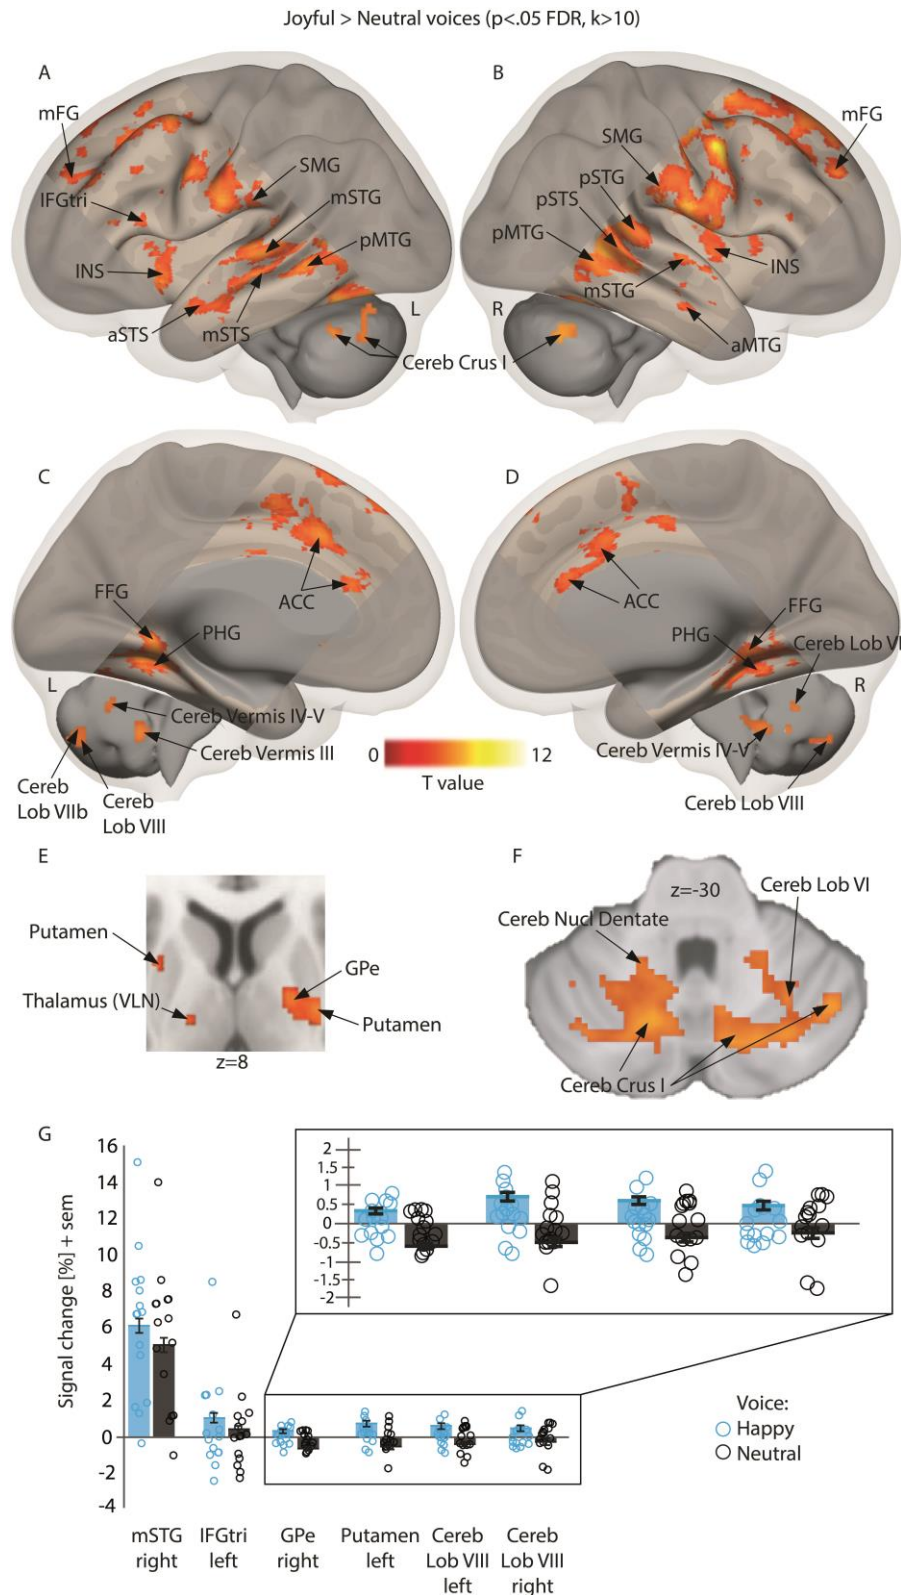

383

384 Fig.3: Enhanced brain measures for implicitly processing happy compared to neutral voices,  
 385 corrected for multiple comparisons (wholebrain voxel-wise  $p < .05$  FDR,  $k > 10$  voxels). A-B,  
 386 Lateral activations rendered on a sagittal image highlighting middle, superior temporal and  
 387 cerebellar regions. C-D, Medial activations of the anterior cingulate cortex, parahippocampal

## Basal ganglia, cerebellum in vocal emotion

388 cortex and cerebellum. E, Subcortical activity in the putamen, thalamus and globus pallidus  
389 displayed on an axial slice. F, Cerebellar activations displayed on an axial slice. G, Percentage  
390 of signal change extracted using singular value decomposition on 9 voxels around each peak  
391 in a subset of regions with individual values (circles), mean values (bars) and standard error  
392 of the mean (error bars) for happy and neutral voices. Blue circles: happy voices; Black  
393 circles: neutral voices. L: left; R: right; IFGtri: inferior frontal gyrus triangularis part; STG:  
394 superior temporal gyrus; STS: superior temporal sulcus; MTG: middle temporal gyrus; INS:  
395 insula; SMG: supramarginal gyrus; FG: frontal gyrus; FFG: fusiform gyrus; PHG:  
396 parahippocampal gyrus; ACC: anterior cingulate cortex; Cereb: cerebellum; Cereb Lob:  
397 cerebellum lobule; Cereb Nucl Dentate: dentate nucleus of the cerebellum; Brainstem LL:  
398 lateral lemniscus of the brainstem; Thalamus VLN: ventral lateral nucleus of the thalamus;  
399 GPe: external globus pallidus; Cereb Crus: cerebellum crus of ansiform lobule; ACC: anterior  
400 cingulate cortex. ‘a’ prefix: anterior part; ‘m’ prefix: mid part; ‘p’ prefix: posterior part.

401

### 402 *Interaction effect between Emotion and Acoustic Parameters factors*

403 The full, two-way interaction between our Emotion and Acoustic Parameters factors did not  
404 reveal significant results when contrasting angry or happy voices to neutral voices while  
405 taking into account normal compared to synthesized voices. We, however, had a specific  
406 hypothesis concerning the rhythmicity of angry voices, namely the impact of the ‘envelope’  
407 of such voices on basal ganglia regions. We therefore used model 3 to compute a contrast  
408 dedicated to highlighting brain regions sensitive to the envelope of angry compared to neutral,  
409 synthesized energy voices [synthesized energy for angry > neutral voices]. The contrast  
410 revealed enhanced activity in the left ventral lateral and lateral posterior nucleus of the  
411 thalamus, putamen, substantia nigra, right caudate head, thalamus as well as in the bilateral  
412 insula, left amygdala and right mid-to-anterior and posterior STG (Table 4). Similar regions,  
413 especially large parts of the STG and STS, were also more active for the synthesized energy  
414 of happy voices, namely for the [synthesized energy for happy > neutral voices] contrast  
415 (Table 5).

## Basal ganglia, cerebellum in vocal emotion

### 416 *Functional connectivity results*

417 Wholebrain analyses revealed significant results for both of our factors (Emotion, Acoustic  
418 Parameters) but their interaction did not yield any above-statistical-threshold activations.  
419 Computing functional/effective connectivity analyses (both seed-to-seed and seed-to-voxel),  
420 however, did reveal several coupled and anti-coupled networks underlying such two-way  
421 interaction between the Emotion and the Acoustic Parameters factors. While functional  
422 connectivity results were primarily used to further compute effective connectivity, we kept  
423 them in the present section due to their specificity and general meaning. These results are  
424 presented below.

### 425 *Seed-to-seed functional connectivity*

426 Computed using 137 ROI composed of 58 ‘aal’ regions within our field of view, 23 brainstem  
427 regions, 22 basal ganglia regions and 34 cerebellum regions, seed-to-seed analyses revealed  
428 significant results for the interaction between Emotion and Acoustic Parameters factors, for  
429 each emotion of interest. Our contrasts of interest therefore included angry or happy  
430 compared to neutral voices when spoken normally as opposed to synthesized  $f_0$  and energy  
431 voices. Seed-to-seed functional connectivity specific to angry original voices were therefore  
432 computed with the [angry > neutral voices \* original >  $f_0$  & energy synthesized voices]  
433 contrast, revealing coupled networks. As predicted, we observed coupling between the basal  
434 ganglia and the cerebellum, more specifically between the left GPe and right cerebellum  
435 lobule X (Fig. 4). Coupled functional connectivity was also observed between the left pSTG  
436 and right frontal operculum and in the brainstem between major motor (right parieto-occipito-  
437 temporo-pontine tract) and sensory tracts (bilateral spinothalamic tract). Detailed results are  
438 reported in Table 6.

## Basal ganglia, cerebellum in vocal emotion

Angry > Neutral \* Original voices >  $f_0$  & energy synthesized voices  
(seed-to-seed analysis,  $p < .05$  FDR)

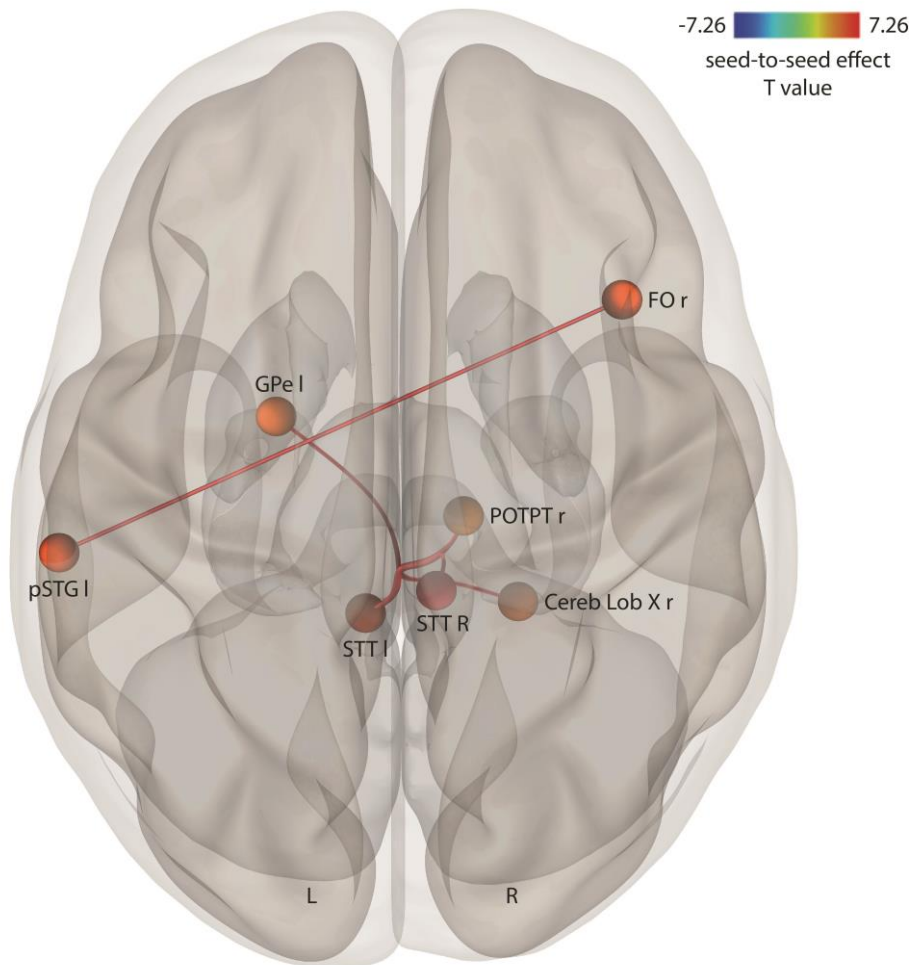

439

440 Fig.4: Coupled seed-to-seed, gPPI functional connectivity for the interaction between the  
441 Emotion and the Acoustic parameter factors contrasting angry > neutral voices \* original >  $f_0$   
442 & energy synthesized voices, corrected for multiple comparisons ( $p < .05$  FDR). l and L: left; r  
443 and R: right; FO: frontal operculum; GPe: external globus pallidus; pSTG: posterior superior  
444 temporal gyrus; STT: spinothalamic tract of the brainstem; POTPT: parieto-occipito-temporo-  
445 pontine tract of the brainstem; Cereb Lob: cerebellum lobule.

446

447 Looking at positive emotion stimuli, happy voices yielded coupled and anti-coupled seed-to-  
448 seed functional connectivity results, as seen in the [happy > neutral voices \* original >  $f_0$  &  
449 energy synthesized voices] contrast (Fig.5). Coupled functional connectivity revealed three  
450 distinct networks: 1) Internal globus pallidus (GPI) and aSTG in the right hemisphere; 2) Left

Basal ganglia, cerebellum in vocal emotion

451 pMTG and right central operculum cortex; 3) Right corticospinal tract (major motor tract) and  
452 right lateral lemniscus (major sensory tract). Happy voices also led to two separate anti-  
453 coupled networks involving the right paracingulate cortex and subcalcarine cortex as well as  
454 in posterior temporal areas, namely between the left pMTG and right pSTG (Fig.5). Details  
455 reported in Table 7.

Happy > Neutral \* Original voices >  $f_0$  & energy synthesized voices  
(seed-to-seed analysis,  $p < .05$  FDR)

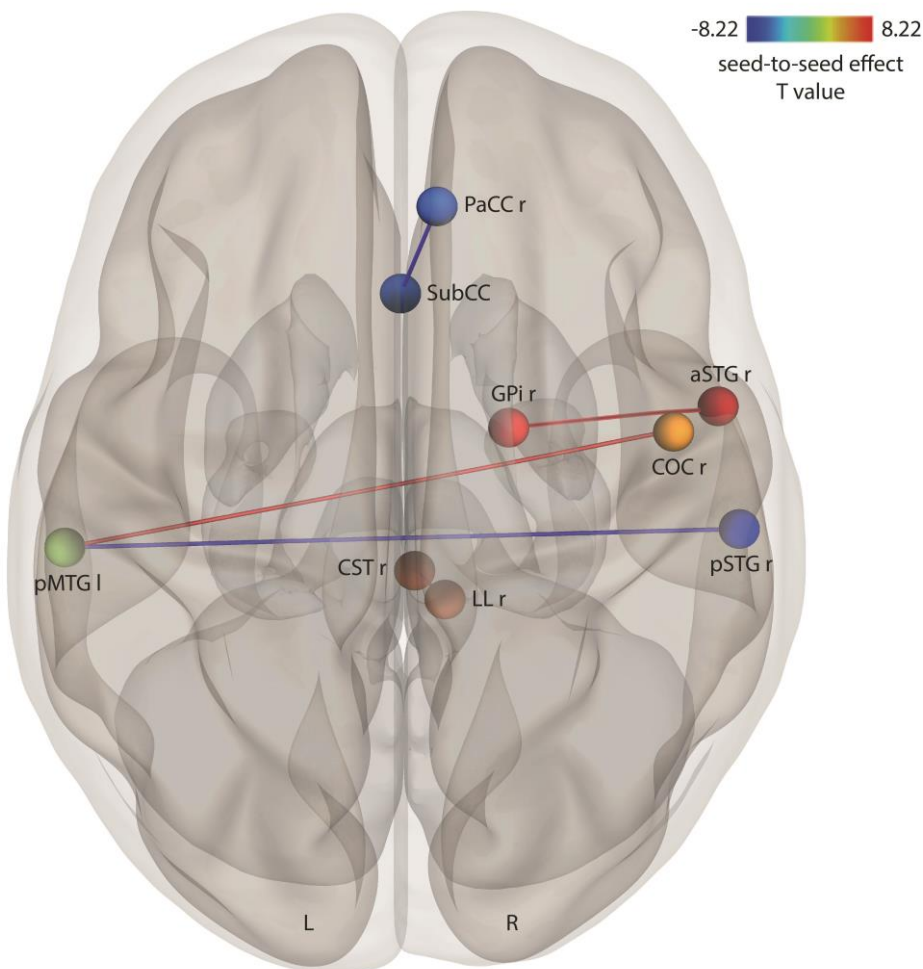

456

457 Fig.5: Coupled and anti-coupled seed-to-seed, gPPI functional connectivity for the interaction  
458 between the Emotion and the Acoustic parameter factors contrasting happy > neutral voices \*  
459 original >  $f_0$  & energy synthesized voices, corrected for multiple comparisons ( $p < .05$  FDR). L  
460 and R: right; PaCC: paracingulate cortex; SubCC: subcalcarine cortex; GPI:  
461 internal globus pallidus; COC: central operculum cortex; aSTG: anterior superior temporal

Basal ganglia, cerebellum in vocal emotion

462 gyrus; pSTG: posterior superior temporal gyrus; pMTG: posterior middle temporal gyrus;  
463 CST: corticospinal tract of the brainstem; LL: lateral lemniscus of the brainstem.

464

465 *Seed-to-voxel effective connectivity with the basal ganglia as seeds*

466 In order to determine the direct relations between BG regions and the rest of the brain, namely  
467 each voxel, we computed seed-to-voxel analyses using multivariate regressions and took as  
468 seeds only the BG (N=22 ROI; Fig.6). We only observed significant effective connectivity  
469 specific to angry –but not happy–voices through the interaction with the Acoustic Parameters  
470 factor [angry > neutral voices \* original >  $f_0$  & energy synthesized voices]. This multivariate  
471 analysis revealed a direct coupling between the left STN (seed) and the ipsilateral cerebellum  
472 crus II of ansiform lobule (MNI xyz -4 -86 -42;  $t_{14}=4.14$ ,  $k=26$  voxels;  $p=0.031$  FDR  
473 corrected, two-tailed; Fig.6A). We also observed an anti-coupling between the left GPe (seed)  
474 and left temporo-occipital MTG (MNI xyz -60 -50 -2) and MFG (MNI xyz -44 34 20; for both  
475 contrasts,  $t_{14}=4.14$ ,  $k= 29$  and  $20$  voxels, respectively;  $p=0.018$  and  $0.048$  FDR corrected, two-  
476 tailed, respectively; Fig.6B). Finally, direct coupling was observed between the left caudate  
477 nucleus (seed) and voxels covering part of the right primary auditory cortex and planum  
478 temporale (MNI xyz 54 -12 0;  $t_{14}=4.14$ ,  $k= 64$  voxels,  $p=0.00009$  FDR corrected, two-tailed;  
479 Fig.6C).

Basal ganglia, cerebellum in vocal emotion

Effective connectivity analysis (seed-to-voxel), seeds within the basal ganglia,  $p < .05$  FDR  
Angry > Neutral \* Original voices >  $f_0$  & energy

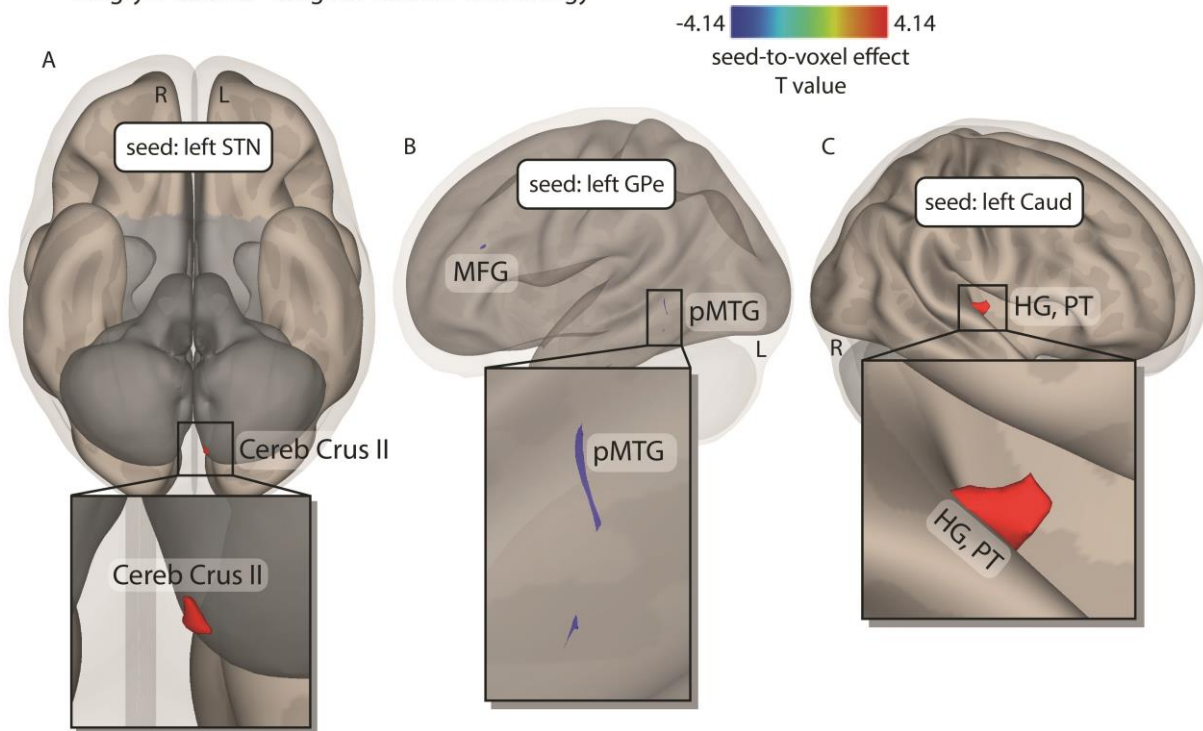

480

481 Fig.6: Coupled and anti-coupled seed-to-voxel, gPPI effective connectivity for the interaction  
482 between the Emotion and the Acoustic parameter factors contrasting angry > neutral voices \*  
483 original >  $f_0$  & energy synthesized voices, corrected for multiple comparisons ( $p < .05$  FDR).  
484 A, Inferior view showing direct coupling between the left STN (seed) and the ipsilateral  
485 Cerebellum Crus II. B, Sagittal view showing direct anti-coupling between the left GPe (seed)  
486 and the left MFG and pMTG. C, Sagittal view showing direct coupling between the left  
487 caudate nucleus (seed) and the right primary auditory cortex (Heschl's gyrus) and planum  
488 temporale. L: left; R: right; STN: subthalamic nucleus; GPe: external globus pallidus; Caud:  
489 caudate nucleus; Cereb Crus II: cerebellum crus II of ansiform lobule; pMTG: posterior  
490 middle temporal gyrus; MFG: middle frontal gyrus; HG: Heschl's gyrus; PT: planum  
491 temporale.

492

493 *Seed-to-seed effective connectivity within the basal ganglia*

494 We were ultimately interested in the effective connectivity within the basal ganglia when  
495 processing emotional (angry, happy) voices and independently of low-level acoustic



## Basal ganglia, cerebellum in vocal emotion

496 parameters (synthesized  $f_0$ , energy). We therefore used multiple regression analyses within  
497 the BG for our interaction contrasts to highlight direct relations between BG regions. The  
498 anger specific contrast [angry > neutral voices \* original >  $f_0$  & energy synthesized voices]  
499 did not reveal any effective connectivity in BG regions whereas the happiness specific  
500 contrast [happy > neutral voices \* original >  $f_0$  & energy synthesized voices] revealed  
501 coupling between the left putamen and GPi ( $t_{14}=3.78$ ,  $p=0.030$  FDR corrected, two-tailed) as  
502 well as anti-coupling between the left GPi and the ipsilateral nucleus accumbens ( $t_{14}=-3.65$ ,  
503  $p=0.039$  FDR corrected, two-tailed).

504

## 505 **Discussion**

506 The present study aimed at determining the functional role of both the basal ganglia and  
507 cerebellum according to an integrative neural model of vocal emotion perception, decoding  
508 and integration using focal, high-resolution fMRI. It was assumed that connectivity –  
509 functional and/or effective– between the BG and the cerebellum would underlie the  
510 differential processing of emotion, namely angry and/or happy compared to neutral voices,  
511 especially when constraining our data by the use of low-level acoustic parameters of no-  
512 interest (synthesized  $f_0$  and synthesized energy voices). Our results confirmed the  
513 hypothesized involvement of subparts of the BG and cerebellum in processing vocal  
514 emotions. The interaction between emotion and acoustical parameters yielded significant  
515 results only for connectivity analyses. Functional connectivity data revealed coupled and anti-  
516 coupled networks involving the BG and cerebellum, while effective connectivity within the  
517 BG and with the BG as seeds, shed new light on the involvement of the internal and external  
518 globus pallidus, putamen, left STN and caudate nucleus in vocal emotion processing.

Basal ganglia, cerebellum in vocal emotion

519           The implication of subcortical structures other than the amygdala involved in emotion  
520 processing was only recently emphasized (Wager, Barrett et al. 2008, Tamietto and De Gelder  
521 2010) and through deep brain stimulation in the STN as a neurosurgical treatment for  
522 Parkinson’s disease and obsessive-compulsive disorder, a new research window opened (for a  
523 review, see Péron, Frühholz et al. 2013). According to Péron and colleagues’ model (2013)  
524 and in line with existing literature and our results, the processing of emotion would rely on  
525 both the direct (‘hyperdirect pathway’) and indirect coupling between STN subterritories  
526 (motor, associative and limbic) and the neocortex, especially the orbitofrontal cortex (OFC)  
527 and modality-specific primary and secondary cortices. Indirect coupling would transit from  
528 the STN to the OFC through the BG, especially the GPi and GPe, thalamus, substantia nigra  
529 and ventral tegmental area, and/or through the amygdala that exhibits some direct connections  
530 with the BG as well (Péron, Frühholz et al. 2013). The STN could synchronize oscillations in  
531 relevant areas across the brain including the cerebellum to shape cortical learning and  
532 facilitate habitual, overlearned processing of familiar stimuli types (Pierce and Péron 2020).  
533 Our results fit well with such model and constrain it by adding some nuance to the expected  
534 synchronized regions across the brain. In fact, we observed enhanced activity in several  
535 subparts of the BG and in different territories of the cerebellum. More specifically, we  
536 observed for angry –similarly for happy– voice processing the involvement of the GPe and  
537 thalamus as well as of several lobules (IV, V, VI), nuclei (fastigial, dentate) and areas (Vermis  
538 area VI) of the cerebellum and posterior, mid and anterior temporal regions within the voice-  
539 sensitive areas. GP activity fits with a more accurate recognition of vocal emotion in healthy  
540 compared to BG-lesioned patients (Paulmann, Pell et al. 2008), and with a general role of the  
541 more dorsal BG for the sequencing and anticipation of acoustic temporal variations (Kotz,  
542 Schwartze et al. 2009). The BG would therefore be crucial to detect and classify auditory

Basal ganglia, cerebellum in vocal emotion

543 patterns, subsequently synchronizing activity in other regions for selecting the appropriate  
544 response.

545         The ‘limbic’ cerebellum –predominately the vermis and posterior lobules, present in  
546 our wholebrain and connectivity results– then could modulate these cortical oscillations based  
547 on prediction error feedback relative to the given context (Booth, Wood et al. 2007,  
548 Schmahmann 2019). By continuously monitoring incoming stimuli for deviations from  
549 expected emotional structure (e.g., an angry voice), the limbic cerebellum and especially its  
550 subparts –in our results, lobules IV-VI, VIII and the Vermis IV and VI– could signal the need  
551 for greater attentional control of sensory cortical responses. Cerebellum activity in our results  
552 would also fit well with response adaptation and motor control, preparing a response  
553 following vocal emotion decoding and processing (for a review see Frühholz, Trost et al.  
554 2016), especially when the voice or sound is perceived as aversive (Zald and Pardo 2002).  
555 Input to the limbic cerebellum (Vermis, cerebellar lobules IV-IX, dentate and fastigial  
556 nucleus) from OFC or the BG regarding the salience of emotional stimuli would shape  
557 internal models about how an emotional response would affect the individual in its current  
558 state, and, thus, how the cerebellum modifies limbic responses, especially in the temporal  
559 domain (Breska and Ivry 2018). The idea of temporal pattern analysis in the cerebellum has  
560 been proposed, especially when patterns are irregular and not rhythmic (Breska and Ivry  
561 2016), which includes vocal emotion and emotional prosody. Specifically, a double  
562 dissociation between patients with a BG or cerebellum lesion confirmed that cerebellar  
563 lesions alter non-rhythmic – but not rhythmic – temporal prediction while BG lesions showed  
564 the opposite pattern (Breska and Ivry 2018). Additionally, misattributions in emotion  
565 recognition between surprise and fear correlated with lesions in lobules VIIIb, VIII and X of  
566 the cerebellum (Thomasson, Saj et al. 2019), regions that overlap with our results for angry  
567 and happy voices in both the wholebrain activation and connectivity analyses and are in line

Basal ganglia, cerebellum in vocal emotion

568 with previous evidence of emotional processing within these specific regions (Stoodley and  
569 Schmahmann 2009, Stoodley and Schmahmann 2009, Leggio and Olivito 2018). Therefore,  
570 these cerebellar lobules may play a crucial function in emotion recognition in voices, notably  
571 in temporal pattern analysis and critical low-level acoustics integration such as  $f_0$  or pitch.

572 The importance of BG-cerebellum connections in vocal emotion processing, especially  
573 for anger, was further emphasized by our functional connectivity data for angry, but not  
574 happy, original voice processing (removing the variance explained by synthesized  $f_0$  and  
575 energy), which revealed coupling between the GPi and putamen with lobule X of the  
576 cerebellum. These results are consistent with a coupling of BG and cerebellum activity in time  
577 for autonomic emotional reaction and prediction generation (Annoni, Ptak et al. 2003) but  
578 cerebellar lobule X is more rarely observed in emotion-related tasks. This cerebellar lobule  
579 was however recently integrated in the ‘triple nonmotor representation’ and evidence shows  
580 its limbic ties with the neocortex (Guell, Schmahmann et al. 2018). It is also important to note  
581 here that many cerebellar sub-regions often labelled as ‘motor’ (for example, linked to hand  
582 or eye movements) are also significantly involved in cognitive or emotional tasks (Stoodley  
583 and Schmahmann 2010, Stoodley, Valera et al. 2012), a good example concerns lobules V,  
584 VI, VIII (King, Hernandez-Castillo et al. 2019). Our results therefore converge toward a  
585 critical role of the cerebellum in coordination with the BG for both the decoding of vocal  
586 emotion –in the temporal, voice-sensitive areas– and the conversion to a motor response as an  
587 output behaviour following a subjective feeling of emotion (Frühholz, Trost et al. 2016,  
588 Pierce and Péron 2020).

589 Furthermore, our effective connectivity results strongly emphasized within-BG direct  
590 relations between the putamen and GPi (coupling) and between the GPi and nucleus  
591 accumbens (anti-coupling) as well as between BG seeds and frontal and superior temporal  
592 regions. Additionally, effective seed-to-voxel connectivity revealed direct coupling between

## Basal ganglia, cerebellum in vocal emotion

593 the left STN and ipsilateral cerebellum crus II of the ansiform lobule. While the role of the  
594 STN in emotion processing (Schneider, Habel et al. 2003, Kühn, Hariz et al. 2005, Mallet,  
595 Schüpbach et al. 2007, Sieger, Serranová et al. 2015, Péron 2016) and vocal emotion  
596 recognition (Péron, Grandjean et al. 2010, Péron, Frühholz et al. 2013, Péron, Frühholz et al.  
597 2015, Frühholz, Trost et al. 2016, Péron, Renaud et al. 2017) has gathered strong interest in  
598 the recent years, the crus II area of the cerebellum also subserves cognition and emotion  
599 processes (Schmahmann 2001, Baumann and Mattingley 2012, Adamaszek, D'Agata et al.  
600 2017). Direct coupling was also observed between the left caudate nucleus and the primary  
601 auditory cortex and planum temporale, fitting well again with the direct coupling between the  
602 BG and modality-specific sensory cortex (Péron, Frühholz et al. 2013) with the caudate  
603 playing a critical role in voice arousal (Bestelmeyer, Kotz et al. 2017) and emotion processing  
604 (Grandjean 2017).

605 We interestingly also observed direct anti-coupling between the left GPe, involved in  
606 the explicit recognition of emotional prosody (Paulmann, Pell et al. 2008), and ipsilateral  
607 posterior MTG and MFG, superior to and slightly overlapping with the triangularis part of the  
608 IFG. Activity modulations in these latter lateral brain areas were repeatedly observed in voice  
609 processing in general (Aglieri, Chaminade et al. 2018) and vocal emotion (Leitman, Wolf et  
610 al. 2010, Witteman, Van Heuven et al. 2012), especially when contrasting happy to angry  
611 voices (Johnstone, Van Reekum et al. 2006). The fact that posterior MTG activity was  
612 previously linked to happy vs. angry voice processing therefore could explain the coupling we  
613 observed that is specific to happy voices, especially since GP functioning relates to explicit  
614 vs. implicit emotion recognition (Paulmann, Pell et al. 2008).

615 While our data depict a relatively clear image of the importance of the BG and  
616 cerebellum for vocal emotion processing and further output response, some limitations should  
617 be mentioned. First, sample size was limited and even though we were strict with the

Basal ganglia, cerebellum in vocal emotion

618 correction of  $p$  values in our statistical analyses, a sample size closer to 25 participants would  
619 have been better for reliable data generalization. Second, and as often observed in the  
620 literature, we included happy, angry and neutral emotions as vocal stimuli but other critical  
621 emotions such as fear, surprise, sadness or several others were not included, therefore  
622 restricting our conclusions. Third, although we did include low-level acoustic parameters to  
623 control for emotion-specific activity, other meaningful ones should be used in the future, for  
624 instance the spectral domain related to voice quality perception, which is thought also  
625 important for emotional voice recognition. Fourth, we used high-resolution fMRI, greatly  
626 improving spatial resolution with, however, the added cost of a truncated field of view. We  
627 cannot therefore exclude the fact that frontal and parietal regions, excluded at data acquisition,  
628 would play a role in vocal emotion processing, in terms of both activation and connectivity. It  
629 is, however, worth mentioning that the focus of the present study was on cerebellar and basal  
630 ganglia contributions to vocal emotion processing. Fifth, we did not divide the STN and other  
631 BG or cerebellar regions into their known associative, motor and limbic subparts. A more  
632 precise understanding of the specific role of each subpart of the BG nuclei is therefore  
633 unfortunately not possible at this stage. Such concern should be addressed in the future by the  
634 use of subject-level delineation of BG sub-territories and/or by using even higher fMRI  
635 resolution, such as with a 7-tesla scanner. Finally, while our functional connectivity results  
636 were consistent with existing literature, we cannot rule out that other regions may mediate the  
637 correlations between ROI, so these should be taken with more caution than the effective  
638 connectivity results that used more direct mathematical association calculations (multiple  
639 regressions). In addition to these limitations, future studies should try to highlight emotional  
640 substrates within the BG and cerebellum pertaining to sub-components of emotion, such as  
641 for example perception and/or decoding, subjective feeling, response output, behavioural

## Basal ganglia, cerebellum in vocal emotion

642 response to emotion, as well as giving more importance to task designs allowing for a clearer  
643 topography and parcellation of the affective BG and cerebellum.

644 In conclusion, the present study aimed at a better understanding of the implications of  
645 basal ganglia and cerebellum involvement in vocal emotion processing. Through the  
646 combination of wholebrain analysis, functional and effective connectivity analyses and with  
647 the partial exclusion of low-level acoustics of interest (voice  $f_0$ , energy) our data depict a  
648 clearer role of the STN, GP and putamen in vocal emotion processing, especially for auditory  
649 pattern detection and synchronization across cortical and subcortical limbic networks. The  
650 current results add weight to the assertion that both direct and indirect coupling between these  
651 BG regions and the cortex is modulated by BG and cerebellum connections. Our results also  
652 favour a framework in which the brain could use temporal regularities ('patterns') to analyse  
653 and anticipate the timing of future events, and constrain attention and action accordingly.  
654 Further work use a dedicated task and focus on BG and cerebellum subterritories since their  
655 specific role(s) is of the highest interest for affective and social neuroscience research.

656

### 657 **Acknowledgements**

658 The present study was performed at the Brain and Behaviour Laboratory and at the Swiss  
659 Center for Affective Sciences of the University of Geneva and was funded by Swiss National  
660 Foundation grant no. 105314\_1406 22 (DG-JP) and 105314\_182221 (JP). The funders had  
661 no role in data collection, discussion of content, preparation of the manuscript, or decision to  
662 publish. We would like to thank the healthy controls for contributing their time to this study.

663

### 664 **Conflict of interest**

665 The authors report no conflicts of interest.

Basal ganglia, cerebellum in vocal emotion

666 **References**

- 667 Adamaszek, M., F. D'Agata, R. Ferrucci, C. Habas, S. Keulen, K. Kirkby, M. Leggio, P.  
668 Mariën, M. Molinari and E. Moulton (2017). "Consensus paper: cerebellum and emotion."  
669 The Cerebellum **16**(2): 552-576.
- 670 Aglieri, V., T. Chaminade, S. Takerkart and P. Belin (2018). "Functional connectivity within  
671 the voice perception network and its behavioural relevance." NeuroImage **183**: 356-365.
- 672 Alexander, G. E. and M. D. Crutcher (1990). "Functional architecture of basal ganglia  
673 circuits: neural substrates of parallel processing." Trends in neurosciences **13**(7): 266-271.
- 674 Amunts, K., C. Lepage, L. Borgeat, H. Mohlberg, T. Dickscheid, M.-É. Rousseau, S. Bludau,  
675 P.-L. Bazin, L. B. Lewis and A.-M. Oros-Peusquens (2013). "BigBrain: an ultrahigh-  
676 resolution 3D human brain model." Science **340**(6139): 1472-1475.
- 677 Annoni, J. M., R. Ptak, A. S. Caldarara-Schnetzer, A. Khateb and B. Z. Pollermann (2003).  
678 "Decoupling of autonomic and cognitive emotional reactions after cerebellar stroke." Annals  
679 of Neurology: Official Journal of the American Neurological Association and the Child  
680 Neurology Society **53**(5): 654-658.
- 681 Ashburner, J. (2007). "A fast diffeomorphic image registration algorithm." Neuroimage **38**(1):  
682 95-113.
- 683 Banse, R. and K. R. Scherer (1996). "Acoustic profiles in vocal emotion expression." J Pers  
684 Soc Psychol **70**(3): 614-636.
- 685 Banziger, T. and K. R. Scherer (2010). Introducing the Geneva Multimodal Emotion Portrayal  
686 (GEMEP) Corpus A blueprint for an affectively competent agent: Cross-fertilization  
687 between Emotion Psychology, Affective Neuroscience, and Affective Computing. T.  
688 Banziger, K. Scherer and E. Roesch. Oxford, Oxford University Press.
- 689 Baumann, O. and J. B. Mattingley (2012). "Functional topography of primary emotion  
690 processing in the human cerebellum." NeuroImage **61**(4): 805-811.



Basal ganglia, cerebellum in vocal emotion

- 691 Bestelmeyer, P. E., S. A. Kotz and P. Belin (2017). "Effects of emotional valence and arousal  
692 on the voice perception network." Social cognitive and affective neuroscience **12**(8): 1351-  
693 1358.
- 694 Booth, J. R., L. Wood, D. Lu, J. C. Houk and T. Bitan (2007). "The role of the basal ganglia  
695 and cerebellum in language processing." Brain Research **1133**: 136-144.
- 696 Bostan, A. C. and P. L. Strick (2018). "The basal ganglia and the cerebellum: nodes in an  
697 integrated network." Nat Rev Neurosci **19**(6): 338-350.
- 698 Breska, A. and R. B. Ivry (2016). "Taxonomies of timing: where does the cerebellum fit in?"  
699 Current opinion in behavioral sciences **8**: 282-288.
- 700 Breska, A. and R. B. Ivry (2018). "Double dissociation of single-interval and rhythmic  
701 temporal prediction in cerebellar degeneration and Parkinson's disease." Proceedings of the  
702 National Academy of Sciences **115**(48): 12283-12288.
- 703 Buckner, R. L., F. M. Krienen, A. Castellanos, J. C. Diaz and B. T. Yeo (2011). "The  
704 organization of the human cerebellum estimated by intrinsic functional connectivity." Journal  
705 of neurophysiology.
- 706 Cohen, M. J., C. A. Riccio and A. M. Flannery (1994). "Expressive aprosodia following  
707 stroke to the right basal ganglia: A case report." Neuropsychology **8**(2): 242.
- 708 Collins, D. L., P. Neelin, T. M. Peters and A. C. Evans (1994). "Automatic 3D intersubject  
709 registration of MR volumetric data in standardized Talairach space." Journal of computer  
710 assisted tomography **18**(2): 192-205.
- 711 Diedrichsen, J., J. H. Balsters, J. Flavell, E. Cussans and N. Ramnani (2009). "A probabilistic  
712 MR atlas of the human cerebellum." Neuroimage **46**(1): 39-46.
- 713 Diedrichsen, J., S. Maderwald, M. Küper, M. Thürling, K. Rabe, E. Gizewski, M. E. Ladd and  
714 D. Timmann (2011). "Imaging the deep cerebellar nuclei: a probabilistic atlas and  
715 normalization procedure." Neuroimage **54**(3): 1786-1794.

Basal ganglia, cerebellum in vocal emotion

- 716 Ethofer, T., S. Anders, M. Erb, C. Herbert, S. Wiethoff, J. Kissler, W. Grodd and D.  
717 Wildgruber (2006). "Cerebral pathways in processing of affective prosody: a dynamic causal  
718 modeling study." Neuroimage **30**(2): 580-587.
- 719 Fonov, V., A. C. Evans, K. Botteron, C. R. Almli, R. C. McKinstry, D. L. Collins and B. D.  
720 C. Group (2011). "Unbiased average age-appropriate atlases for pediatric studies."  
721 Neuroimage **54**(1): 313-327.
- 722 Frühholz, S., L. Ceravolo and D. Grandjean (2011). "Specific brain networks during explicit  
723 and implicit decoding of emotional prosody." Cerebral cortex **22**(5): 1107-1117.
- 724 Frühholz, S., L. Ceravolo and D. Grandjean (2012). "Specific brain networks during explicit  
725 and implicit decoding of emotional prosody." Cerebral cortex **22**(5): 1107-1117.
- 726 Frühholz, S. and D. Grandjean (2013). "Multiple subregions in superior temporal cortex are  
727 differentially sensitive to vocal expressions: a quantitative meta-analysis." Neuroscience &  
728 Biobehavioral Reviews **37**(1): 24-35.
- 729 Frühholz, S. and D. Grandjean (2013). "Processing of emotional vocalizations in bilateral  
730 inferior frontal cortex." Neuroscience & Biobehavioral Reviews **37**(10): 2847-2855.
- 731 Frühholz, S., W. Trost and S. A. Kotz (2016). "The sound of emotions—Towards a unifying  
732 neural network perspective of affective sound processing." Neuroscience & Biobehavioral  
733 Reviews **68**: 96-110.
- 734 Grandjean, D. (2017). Brain Mechanisms in Emotional Voice Production and Perception and  
735 Early Life Interactions. Early Vocal Contact and Preterm Infant Brain Development,  
736 Springer: 71-87.
- 737 Grandjean, D. (in press). "Brain networks of emotional prosody processing." Emotion  
738 Review.
- 739 Grandjean, D., T. Banziger and K. R. Scherer (2006). "Intonation as an interface between  
740 language and affect." Prog Brain Res **156**: 235-247.

Basal ganglia, cerebellum in vocal emotion

- 741 Graybiel, A. M. (2008). "Habits, rituals, and the evaluative brain." *Annu Rev Neurosci* **31**:  
742 359-387.
- 743 Grube, M., F. E. Cooper, P. F. Chinnery and T. D. Griffiths (2010). "Dissociation of duration-  
744 based and beat-based auditory timing in cerebellar degeneration." *Proceedings of the National*  
745 *Academy of Sciences* **107**(25): 11597-11601.
- 746 Guell, X., J. D. Schmahmann, J. D. Gabrieli and S. S. Ghosh (2018). "Functional gradients of  
747 the cerebellum." *Elife* **7**: e36652.
- 748 Habas, C., N. Kamdar, D. Nguyen, K. Prater, C. F. Beckmann, V. Menon and M. D. Greicius  
749 (2009). "Distinct cerebellar contributions to intrinsic connectivity networks." *Journal of*  
750 *neuroscience* **29**(26): 8586-8594.
- 751 Johnstone, T., C. M. Van Reekum, T. R. Oakes and R. J. Davidson (2006). "The voice of  
752 emotion: an fMRI study of neural responses to angry and happy vocal expressions." *Social*  
753 *Cognitive and Affective Neuroscience* **1**(3): 242-249.
- 754 King, M., C. R. Hernandez-Castillo, R. A. Poldrack, R. B. Ivry and J. Diedrichsen (2019).  
755 "Functional boundaries in the human cerebellum revealed by a multi-domain task battery."  
756 *Nature neuroscience* **22**(8): 1371-1378.
- 757 Kotz, S. A. and M. Schwartz (2010). "Cortical speech processing unplugged: a timely  
758 subcortico-cortical framework." *Trends in cognitive sciences* **14**(9): 392-399.
- 759 Kotz, S. A., M. Schwartz and M. Schmidt-Kassow (2009). "Non-motor basal ganglia  
760 functions: A review and proposal for a model of sensory predictability in auditory language  
761 perception." *Cortex* **45**(8): 982-990.
- 762 Kühn, A., M. Hariz, P. Silberstein, S. Tisch, A. Kupsch, G.-H. Schneider, P. Limousin-  
763 Dowsey, K. Yarrow and P. Brown (2005). "Activation of the subthalamic region during  
764 emotional processing in Parkinson disease." *Neurology* **65**(5): 707-713.

Basal ganglia, cerebellum in vocal emotion

- 765 Lambert, C., L. Zrinzo, Z. Nagy, A. Lutti, M. Hariz, T. Foltynie, B. Draganski, J. Ashburner  
766 and R. Frackowiak (2012). "Confirmation of functional zones within the human subthalamic  
767 nucleus: patterns of connectivity and sub-parcellation using diffusion weighted imaging."  
768 Neuroimage **60**(1): 83-94.
- 769 Larry, N., M. Yarkoni, A. Lixenberg and M. Joshua (2019). "Cerebellar climbing fibers  
770 encode expected reward size." bioRxiv: 533653.
- 771 Leggio, M. and G. Olivito (2018). Topography of the cerebellum in relation to social brain  
772 regions and emotions. Handbook of clinical neurology, Elsevier. **154**: 71-84.
- 773 Leitman, D. I., D. H. Wolf, J. D. Ragland, P. Laukka, J. Loughhead, J. N. Valdez, D. C. Javitt,  
774 B. Turetsky and R. Gur (2010). "" It's not what you say, but how you say it": a reciprocal  
775 temporo-frontal network for affective prosody." Frontiers in human neuroscience **4**: 19.
- 776 Mallet, L., M. Schüpbach, K. N'Diaye, P. Remy, E. Bardinet, V. Czernecki, M.-L. Welter, A.  
777 Pelissolo, M. Ruberg and Y. Agid (2007). "Stimulation of subterritories of the subthalamic  
778 nucleus reveals its role in the integration of the emotional and motor aspects of behavior."  
779 Proceedings of the National Academy of Sciences **104**(25): 10661-10666.
- 780 Paulmann, S., M. D. Pell and S. A. Kotz (2008). "Functional contributions of the basal  
781 ganglia to emotional prosody: Evidence from ERPs." Brain Research **1217**: 171-178.
- 782 Pell, M. D. and C. L. Leonard (2003). "Processing emotional tone from speech in Parkinson's  
783 disease: a role for the basal ganglia." Cognitive, Affective, & Behavioral Neuroscience **3**(4):  
784 275-288.
- 785 Péron, J. (2016). "The role of the subthalamic nucleus in emotional processing." Clinical  
786 Neurophysiology **127**(3): e39.
- 787 Péron, J., S. Frühholz, L. Ceravolo and D. Grandjean (2015). "Structural and functional  
788 connectivity of the subthalamic nucleus during vocal emotion decoding." Social cognitive and  
789 affective neuroscience **11**(2): 349-356.

Basal ganglia, cerebellum in vocal emotion

- 790 Péron, J., S. Frühholz, L. Ceravolo and D. Grandjean (2016). "Structural and functional  
791 connectivity of the subthalamic nucleus during vocal emotion decoding." Soc Cogn Affect  
792 Neurosci **11**(2): 349-356.
- 793 Péron, J., S. Frühholz, M. Vérin and D. Grandjean (2013). "Subthalamic nucleus: A key  
794 structure for emotional component synchronization in humans." Neurosci Biobehav Rev  
795 **37**(3): 358-373.
- 796 Péron, J., S. Frühholz, M. Vérin and D. Grandjean (2013). "Subthalamic nucleus: A key  
797 structure for emotional component synchronization in humans." Neuroscience &  
798 Biobehavioral Reviews **37**(3): 358-373.
- 799 Péron, J., D. Grandjean, F. Le Jeune, P. Sauleau, C. Haegelen, D. Drapier, T. Rouaud, S.  
800 Drapier and M. Vérin (2010). "Recognition of emotional prosody is altered after subthalamic  
801 nucleus deep brain stimulation in Parkinson's disease." Neuropsychologia **48**(4): 1053-1062.
- 802 Péron, J., C. Haegelen, P. Sauleau, L. Tamarit, V. Milesi, J. F. Houvenaghel, T. Dondaine, M.  
803 Vérin and D. Grandjean (2014). "Electrophysiological activity of the subthalamic nucleus in  
804 response to emotional prosody: An intracranial ERP study in Parkinson's disease." Movement  
805 Disorders **29**(S284-S285).
- 806 Péron, J., O. Renaud, C. Haegelen, L. Tamarit, V. Milesi, J.-F. Houvenaghel, T. Dondaine, M.  
807 Vérin, P. Sauleau and D. Grandjean (2017). "Vocal emotion decoding in the subthalamic  
808 nucleus: An intracranial ERP study in Parkinson's disease." Brain and language **168**: 1-11.
- 809 Pierce, J. E. and J. Péron (2020). "The basal ganglia and the cerebellum in human emotion."  
810 Social Cognitive and Affective Neuroscience.
- 811 Reid, A. T., D. B. Headley, R. D. Mill, R. Sanchez-Romero, L. Q. Uddin, D. Marinazzo, D. J.  
812 Lurie, P. A. Valdés-Sosa, S. J. Hanson and B. B. Biswal (2019). "Advancing functional  
813 connectivity research from association to causation." Nature neuroscience **1**(10).

Basal ganglia, cerebellum in vocal emotion

- 814 Schirmer, A. and S. A. Kotz (2006). "Beyond the right hemisphere: brain mechanisms  
815 mediating vocal emotional processing." Trends in cognitive sciences **10**(1): 24-30.
- 816 Schmahmann, J. D. (2001). "The cerebrocerebellar system: Anatomic substrates of the  
817 cerebellar contribution to cognition and emotion." International Review of Psychiatry **13**(4):  
818 247-260.
- 819 Schmahmann, J. D. (2019). "The cerebellum and cognition." Neurosci Lett **688**: 62-75.
- 820 Schneider, F., U. Habel, J. Volkmann, S. Regel, J. Kornischka, V. Sturm and H.-J. Freund  
821 (2003). "Deep brain stimulation of the subthalamic nucleus enhances emotional processing in  
822 Parkinson disease." Archives of general psychiatry **60**(3): 296-302.
- 823 Sieger, T., T. Serranová, F. Růžička, P. Vostatek, J. Wild, D. Šťastná, C. Bonnet, D. Novák,  
824 E. Růžička and D. Urgošík (2015). "Distinct populations of neurons respond to emotional  
825 valence and arousal in the human subthalamic nucleus." Proceedings of the National  
826 Academy of Sciences **112**(10): 3116-3121.
- 827 Smith, S. M., M. Jenkinson, M. W. Woolrich, C. F. Beckmann, T. E. Behrens, H. Johansen-  
828 Berg, P. R. Bannister, M. De Luca, I. Drobnjak and D. E. Flitney (2004). "Advances in  
829 functional and structural MR image analysis and implementation as FSL." Neuroimage **23**:  
830 S208-S219.
- 831 Sokolov, A. A., R. C. Miall and R. B. Ivry (2017). "The Cerebellum: Adaptive Prediction for  
832 Movement and Cognition." Trends Cogn Sci **21**(5): 313-332.
- 833 Stoodley, C. J. and J. D. Schmahmann (2009). "The cerebellum and language: evidence from  
834 patients with cerebellar degeneration." Brain and language **110**(3): 149-153.
- 835 Stoodley, C. J. and J. D. Schmahmann (2009). "Functional topography in the human  
836 cerebellum: a meta-analysis of neuroimaging studies." Neuroimage **44**(2): 489-501.

Basal ganglia, cerebellum in vocal emotion

- 837 Stoodley, C. J. and J. D. Schmahmann (2010). "Evidence for topographic organization in the  
838 cerebellum of motor control versus cognitive and affective processing." Cortex **46**(7): 831-  
839 844.
- 840 Stoodley, C. J., E. M. Valera and J. D. Schmahmann (2012). "Functional topography of the  
841 cerebellum for motor and cognitive tasks: an fMRI study." Neuroimage **59**(2): 1560-1570.
- 842 Tamietto, M. and B. De Gelder (2010). "Neural bases of the non-conscious perception of  
843 emotional signals." Nature Reviews Neuroscience **11**(10): 697.
- 844 Thomasson, M., A. Saj, D. Benis, D. Grandjean, F. Assal and J. Péron (2019). "Cerebellar  
845 contribution to vocal emotion decoding: Insights from stroke and neuroimaging."  
846 Neuropsychologia **132**: 107141.
- 847 Tzourio-Mazoyer, N., B. Landeau, D. Papathanassiou, F. Crivello, O. Etard, N. Delcroix, B.  
848 Mazoyer and M. Joliot (2002). "Automated anatomical labeling of activations in SPM using a  
849 macroscopic anatomical parcellation of the MNI MRI single-subject brain." Neuroimage  
850 **15**(1): 273-289.
- 851 Wager, T. D., L. F. Barrett, E. Bliss-Moreau, K. Lindquist, S. Duncan, H. Kober, J. Joseph,  
852 M. Davidson and J. Mize (2008). "The neuroimaging of emotion." Handbook of emotions **3**:  
853 249-271.
- 854 Wang, J., W. W. Dong, W. H. Zhang, J. Zheng and X. Wang (2014). "Electrical stimulation  
855 of cerebellar fastigial nucleus: mechanism of neuroprotection and prospects for clinical  
856 application against cerebral ischemia." CNS neuroscience & therapeutics **20**(8): 710-716.
- 857 Whitfield-Gabrieli, S. and A. Nieto-Castanon (2012). "Conn: a functional connectivity  
858 toolbox for correlated and anticorrelated brain networks." Brain connectivity **2**(3): 125-141.
- 859 Witteman, J., V. J. Van Heuven and N. O. Schiller (2012). "Hearing feelings: a quantitative  
860 meta-analysis on the neuroimaging literature of emotional prosody perception."  
861 Neuropsychologia **50**(12): 2752-2763.

Basal ganglia, cerebellum in vocal emotion

862 Zald, D. H. and J. V. Pardo (2002). "The neural correlates of aversive auditory stimulation."

863 Neuroimage **16**(3): 746-753.

864 Zhang, X.-Y., J.-J. Wang and J.-N. Zhu (2016). "Cerebellar fastigial nucleus: from anatomic

865 construction to physiological functions." Cerebellum & Ataxias **3**(1): 9.

866

867



Basal ganglia, cerebellum in vocal emotion

868 **Tables**

869 Table 1: Activations, cluster size and coordinates for angry > neutral voices contrast,  
870 wholebrain voxel-wise  $p < .05$  FDR correction,  $k > 10$ .

871 MNI coordinates

| 872 | Region label              | Hemisphere | X   | Y   | Z   | T value | Cluster size (voxels) |
|-----|---------------------------|------------|-----|-----|-----|---------|-----------------------|
| 873 | Precentral gyrus          | R          | 60  | 8   | 26  | 12.77   | 11526                 |
| 874 | Postcentral gyrus         | R          | -58 | -14 | 18  | 10.91   |                       |
| 875 | Precentral gyrus          | R          | 52  | 2   | 46  | 10.88   |                       |
| 876 |                           |            |     |     |     |         |                       |
| 877 | STG, posterior            | R          | 54  | -34 | 12  | 9.75    | 84                    |
| 878 | STS, posterior            | L          | -64 | -48 | 6   | 9.04    | 110                   |
| 879 | ITG, posterior            | L          | -46 | -36 | -16 | 8.71    | 85                    |
| 880 | Amygdala                  | L          | -26 | -6  | -24 | 6.99    | 84                    |
| 881 | Supp Motor Area           | R          | 8   | 6   | 58  | 6.36    | 47                    |
| 882 | Mid Frontal gyrus         | L          | -28 | 26  | 42  | 6.07    | 211                   |
| 883 | Mid Frontal gyrus         | L          | -40 | 36  | 22  | 5.70    | 309                   |
| 884 | Sup Frontal gyrus         | L          | -12 | 36  | 48  | 5.58    | 112                   |
| 885 | Cereb Nucl Fastigial      | R          | 6   | -56 | -28 | 5.54    | 133                   |
| 886 | ACC                       | R          | 8   | 16  | 28  | 5.49    | 117                   |
| 887 | Globus Pallidus           | R          | 18  | -4  | 8   | 5.48    | 105                   |
| 888 | Cereb Crus 2              | R          | 10  | -84 | -36 | 5.29    | 11                    |
| 889 | Globus Pallidus           | L          | -18 | 0   | -4  | 5.07    | 44                    |
| 890 | Temporal pole             | L          | -58 | 10  | -8  | 5.02    | 31                    |
| 891 | ACC                       | R          | 8   | 30  | 18  | 4.92    | 45                    |
| 892 | IFG triangularis          | L          | -50 | 28  | 10  | 4.72    | 14                    |
| 893 | Cereb Lob 8               | L          | -28 | -58 | -52 | 4.59    | 29                    |
| 894 | Supramarginal gyrus       | L          | -66 | -22 | 28  | 4.59    | 13                    |
| 895 | IFG opercularis           | L          | -58 | 16  | 10  | 4.33    | 24                    |
| 896 | Sup Frontal gyrus         | R          | 14  | 48  | 34  | 4.26    | 32                    |
| 897 | IFG triangularis          | L          | -42 | 20  | 8   | 4.17    | 36                    |
| 898 | Cereb Crus 2              | L          | -40 | -74 | -44 | 4.14    | 10                    |
| 899 | Putamen                   | L          | -14 | 10  | -10 | 4.09    | 27                    |
| 900 | Cereb Vermis 1-2          | L          | 0   | -42 | -24 | 3.97    | 20                    |
| 901 | Cereb Lob 6               | L          | -30 | -54 | -38 | 3.96    | 26                    |
| 902 | Sup Frontal gyrus, medial | L          | -8  | 48  | 36  | 3.91    | 33                    |
| 903 | ACC                       | L          | -12 | 26  | 28  | 3.75    | 12                    |
| 904 | Cereb Crus 1              | L          | -40 | -76 | -26 | 3.74    | 18                    |
| 905 | STG, mid                  | L          | -54 | -10 | -4  | 3.59    | 12                    |
| 906 | MTG, anterior             | L          | -62 | -8  | -18 | 3.28    | 20                    |

907 L: left; R: right; MNI: Montreal neurological institute; STG: superior temporal gyrus; STS: superior temporal  
908 sulcus; ITG: inferior temporal gyrus; Supp Motor Area: supplementary motor area; Mid: middle; Sup: superior;  
909 Cereb Nucl Fastigial: fastigial nucleus of the cerebellum; ACC: anterior cingulate cortex; Cereb Crus:  
910 cerebellum crus of ansiform lobule; IFG: inferior frontal gyrus; Cereb Lob: cerebellum lobule; Cereb:  
911 cerebellum; MTG: middle temporal gyrus.

Basal ganglia, cerebellum in vocal emotion

912 Table 2: Activations, cluster size and coordinates for happy > neutral voices contrast,  
913 wholebrain voxel-wise  $p < .05$  FDR correction,  $k > 10$ .

914 MNI coordinates

| 915 | Region label              | Hemisphere | X          | Y          | Z          | T value      | Cluster size (voxels) |
|-----|---------------------------|------------|------------|------------|------------|--------------|-----------------------|
| 916 | Precentral gyrus          | R          | 54         | -2         | 42         | 12.03        | 23099                 |
| 917 | <i>STS, posterior</i>     | <i>R</i>   | <i>62</i>  | <i>-44</i> | <i>4</i>   | <i>10.57</i> |                       |
| 918 | <i>Rolandic operculum</i> | <i>R</i>   | <i>50</i>  | <i>-18</i> | <i>20</i>  | <i>9.89</i>  |                       |
| 919 |                           |            |            |            |            |              |                       |
| 920 | Postcentral gyrus         | L          | -64        | -12        | 20         | 7.05         | 594                   |
| 921 | <i>Postcentral gyrus</i>  | <i>L</i>   | <i>-66</i> | <i>-20</i> | <i>28</i>  | <i>6.96</i>  |                       |
| 922 | <i>Mid Frontal gyrus</i>  | <i>L</i>   | <i>-58</i> | <i>10</i>  | <i>32</i>  | <i>6.35</i>  |                       |
| 923 |                           |            |            |            |            |              |                       |
| 924 | STG, anterior             | L          | -52        | 4          | -6         | 6.39         | 59                    |
| 925 |                           |            |            |            |            |              |                       |
| 926 | STS, anterior             | R          | 66         | -12        | -4         | 5.85         | 119                   |
| 927 | <i>STS, anterior</i>      | <i>R</i>   | <i>66</i>  | <i>-4</i>  | <i>-10</i> | <i>5.39</i>  |                       |
| 928 |                           |            |            |            |            |              |                       |
| 929 | Sup Frontal gyrus         | R          | 4          | 28         | 66         | 5.13         | 133                   |
| 930 |                           |            |            |            |            |              |                       |
| 931 | Mid Frontal gyrus         | L          | -38        | 38         | 28         | 4.99         | 60                    |
| 932 |                           |            |            |            |            |              |                       |
| 933 | STG, anterior             | R          | 52         | -4         | -8         | 4.89         | 77                    |
| 934 | <i>Temporal pole</i>      | <i>R</i>   | <i>60</i>  | <i>8</i>   | <i>-4</i>  | <i>3.87</i>  |                       |
| 935 |                           |            |            |            |            |              |                       |
| 936 | IFG opercularis           | L          | -56        | 18         | 14         | 3.67         | 17                    |
| 937 | IFG triangularis          | R          | 32         | 26         | 26         | 3.56         | 22                    |
| 938 | IFG opercularis           | L          | -44        | 20         | 32         | 3.39         | 13                    |

939 L: left; R: right; MNI: Montreal neurological institute; STS: superior temporal sulcus; Mid: middle; STG:  
940 superior temporal gyrus; Sup: superior; IFG: inferior frontal gyrus.

941

Basal ganglia, cerebellum in vocal emotion

942 Table 3: Activations, cluster size and coordinates for angry & happy> neutral voices contrast,  
943 wholebrain voxel-wise  $p<.05$  FDR correction,  $k>10$ .

944 MNI coordinates

| 945 | Region label                | Hemisphere | X          | Y          | Z         | T value      | Cluster size (voxels) |
|-----|-----------------------------|------------|------------|------------|-----------|--------------|-----------------------|
| 946 | STS, posterior              | R          | 62         | -44        | 2         | 11.32        | 18286                 |
| 947 | <i>Rolandic operculum</i>   | <i>R</i>   | <i>50</i>  | <i>-18</i> | <i>20</i> | <i>10.07</i> |                       |
| 948 | <i>Mid Frontal gyrus</i>    | <i>R</i>   | <i>44</i>  | <i>0</i>   | <i>54</i> | <i>9.89</i>  |                       |
| 949 |                             |            |            |            |           |              |                       |
| 950 | Sup Frontal gyrus           | L          | -10        | 38         | 48        | 6.36         | 148                   |
| 951 |                             |            |            |            |           |              |                       |
| 952 | Mid Frontal gyrus           | L          | -28        | 36         | 16        | 6.11         | 348                   |
| 953 |                             |            |            |            |           |              |                       |
| 954 | STS, mid                    | L          | -62        | -32        | -2        | 6.01         | 337                   |
| 955 | <i>STS, mid</i>             | <i>L</i>   | <i>-66</i> | <i>-22</i> | <i>-4</i> | <i>5.72</i>  |                       |
| 956 | <i>MTG, mid</i>             | <i>L</i>   | <i>-66</i> | <i>-46</i> | <i>-6</i> | <i>4.95</i>  |                       |
| 957 |                             |            |            |            |           |              |                       |
| 958 | Cereb Lob 9                 | L          | -12        | -56        | -50       | 4.78         | 19                    |
| 959 | Insula                      | L          | -40        | -4         | -8        | 4.33         | 18                    |
| 960 | Sup Temporal pole           | L          | -58        | 10         | -8        | 4.18         | 40                    |
| 961 | Mid Frontal gyrus           | L          | -26        | 10         | 48        | 4.12         | 32                    |
| 962 | IFG triangularis            | L          | -50        | 28         | 10        | 4.10         | 68                    |
| 963 | IFG triangularis            | R          | 46         | 22         | 14        | 4.06         | 24                    |
| 964 | Globus Pallidus             | L          | -18        | 0          | 0         | 3.86         | 18                    |
| 965 | IFG triangularis            | L          | -58        | 18         | 10        | 3.62         | 13                    |
| 966 | Sup Frontal gyrus, medial L |            | -8         | 50         | 38        | 3.34         | 18                    |

967 L: left; R: right; MNI: Montreal neurological institute; STS: superior temporal sulcus; Mid: middle; Sup:  
968 superior; MTG: middle temporal gyrus; Cereb Lob: cerebellum lobule; IFG: inferior frontal gyrus.

969

Basal ganglia, cerebellum in vocal emotion

970 Table 4: Activations, cluster size and coordinates for angry > neutral synthesized energy  
971 voices contrast, wholebrain voxel-wise  $p < .05$  FDR correction,  $k > 10$ .

972 MNI coordinates

| 973 | Region label          | Hemisphere | X         | Y         | Z         | T value     | Cluster size (voxels) |
|-----|-----------------------|------------|-----------|-----------|-----------|-------------|-----------------------|
| 974 | Precentral gyrus      | R          | 60        | 8         | 26        | 7.99        | 226                   |
| 975 | Postcentral gyrus     | L          | -56       | -12       | 18        | 7.57        | 397                   |
| 976 | MTG, posterior        | R          | 60        | -46       | 4         | 6.03        | 34                    |
| 977 |                       |            |           |           |           |             |                       |
| 978 | Insula                | R          | 44        | -10       | 4         | 5.81        | 216                   |
| 979 | <i>STG, anterior</i>  | <i>R</i>   | <i>56</i> | <i>-6</i> | <i>-4</i> | <i>5.23</i> |                       |
| 980 |                       |            |           |           |           |             |                       |
| 981 | STG, posterior        | R          | 54        | -34       | 12        | 5.58        | 25                    |
| 982 | STS, posterior        | L          | -62       | -48       | 6         | 5.43        | 20                    |
| 983 | Hypothalamus          | R          | 2         | -4        | -10       | 5.20        | 53                    |
| 984 | Amygdala              | L          | -26       | -6        | -24       | 5.12        | 28                    |
| 985 | MTG, anterior         | R          | 66        | -4        | -16       | 4.89        | 24                    |
| 986 | Parahippocampal gyrus | R          | 26        | -38       | -16       | 4.72        | 151                   |
| 987 | Substantia nigra      | L          | -8        | -28       | -6        | 4.71        | 12                    |
| 988 | Parahippocampal gyrus | L          | -24       | -34       | -4        | 4.04        | 17                    |
| 989 | Thalamus, LPN         | L          | -20       | -16       | 10        | 3.65        | 10                    |
| 990 | Caudate head          | R          | 4         | 10        | -6        | 3.43        | 15                    |
| 991 | Putamen               | L          | -16       | 8         | -8        | 3.40        | 10                    |

992 L: left; R: right; MNI: Montreal neurological institute; MTG: middle temporal gyrus; STG: superior temporal  
993 gyrus; STS: superior temporal sulcus; LPN: lateral posterior nucleus.

994

Basal ganglia, cerebellum in vocal emotion

995 Table 5: Activations, cluster size and coordinates for happy > neutral synthesized energy  
996 voices contrast,  $p < .05$  voxel-wise FDR correction,  $k > 10$ .

997 MNI coordinates

| 998  | Region label          | Hemisphere | X   | Y   | Z   | T value | Cluster size (voxels) |
|------|-----------------------|------------|-----|-----|-----|---------|-----------------------|
| 999  | Precentral gyrus      | R          | 56  | -2  | 42  | 7.96    | 229                   |
| 1000 | STS, posterior        | R          | 62  | -44 | 4   | 6.82    | 486                   |
| 1001 | STS, posterior        | L          | -64 | -32 | -4  | 6.30    | 377                   |
| 1002 | Mid frontal gyrus     | R          | 32  | 28  | 48  | 5.76    | 663                   |
| 1003 | Putamen               | R          | 28  | -10 | 8   | 5.47    | 232                   |
| 1004 | Parahippocampal gyrus | L          | -22 | -44 | -4  | 5.19    | 454                   |
| 1005 | IFG triangularis      | L          | -44 | 26  | 8   | 4.57    | 55                    |
| 1006 | ACC                   | L          | -4  | 12  | 38  | 4.45    | 153                   |
| 1007 | Putamen               | L          | -28 | -18 | 10  | 4.41    | 33                    |
| 1008 | Amygdala              | L          | -26 | -8  | -22 | 4.20    | 63                    |
| 1009 | Thalamus, VPLN        | L          | -18 | -14 | 6   | 3.45    | 10                    |
| 1010 | Caudate head          | L          | -8  | 20  | 0   | 3.35    | 10                    |

1011 L: left; R: right; MNI: Montreal neurological institute; STS: superior temporal sulcus; Mid: middle; IFG: inferior  
1012 frontal gyrus; ACC: anterior cingulate cortex; VPLN: ventral posterior lateral nucleus.

1013  
1014

1015

Basal ganglia, cerebellum in vocal emotion

1016 Table 6: Seed-to-seed functional connectivity (gPPI) for angry > neutral normal > f0 &  
1017 energy synthesized voices contrast,  $p < .05$  seed-level FDR correction, two-tailed.

| 1018 | Seed region label | Target region label | T value | pFDR   |
|------|-------------------|---------------------|---------|--------|
| 1019 | pSTG l            | FO r                | 7.26    | 0.0006 |
| 1020 | GPe l             | Cereb Lob X r       | 4.69    | 0.0470 |
| 1021 | STT l             | POTPT r             | 5.71    | 0.0073 |
| 1022 | STT l             | STT r               | 5.30    | 0.0077 |

1023 FO: frontal operculum; GPe: external globus pallidus; pSTG: posterior superior temporal gyrus; STT:  
1024 spinothalamic tract of the brainstem; POTPT: parieto-occipito-temporo-pontine tract of the brainstem; Cereb  
1025 Lob: cerebellum lobule; l: left; r: right.

1026

Basal ganglia, cerebellum in vocal emotion

1027 Table 7: Seed-to-seed functional connectivity (gPPI) for happy > neutral normal > f0 &  
1028 energy synthesized voices contrast,  $p < .05$  seed-level FDR correction, two-tailed.

| 1029 | Seed region label | Target region label | T value | pFDR value |
|------|-------------------|---------------------|---------|------------|
| 1030 | PaCC r            | SubCC               | -4.73   | 0.0442     |
| 1031 | pMTG l            | COC r               | 4.70    | 0.0374     |
| 1032 | pMTG l            | pSTG r              | -4.45   | 0.0374     |
| 1033 | aSTG r            | GPI r               | 4.70    | 0.0466     |
| 1034 | LL r              | CST r               | 8.22    | 0.0001     |

1035 PaCC: paracingulate cortex; SubCC: subcalcarine cortex; GPI: internal globus pallidus; COC: central operculum  
1036 cortex; aSTG: anterior superior temporal gyrus; pSTG: posterior superior temporal gyrus; pMTG: posterior  
1037 middle temporal gyrus; CST: corticospinal tract of the brainstem; LL: lateral lemniscus of the brainstem.; l: left;  
1038 r: right.
